**Epistatic selection on a selfish *Segregation Distorter* supergene:  
drive, recombination, and genetic load**

Beatriz Navarro-Domínguez, Ching-Ho Chang, Cara L. Brand, Christina A. Muirhead, Daven C.  
Presgraves and Amanda M. Larracuente

Department of Biology, University of Rochester, Rochester, New York, 14610, USA

Correspondence to: [daven.presgraves@rochester.edu](mailto:daven.presgraves@rochester.edu), [alarracu@bio.rochester.edu](mailto:alarracu@bio.rochester.edu)

## 1 **Abstract**

2

3 Meiotic drive supergenes are complexes of alleles at linked loci that together subvert Mendelian segregation  
4 to gain preferential transmission. In males, the most common mechanism of drive involves the disruption  
5 of sperm bearing alternative alleles. While at least two loci are important for male drive— the driver and  
6 the target— linked modifiers can enhance drive, creating selection pressure to suppress recombination. In  
7 this work, we investigate the evolution and genomic consequences of an autosomal multilocus, male  
8 meiotic drive system, *Segregation Distorter (SD)* in the fruit fly, *Drosophila melanogaster*. In African  
9 populations, the predominant *SD* chromosome variant, *SD-Mal*, is characterized by two overlapping,  
10 paracentric inversion on chromosome arm *2R* and nearly perfect (~100%) transmission. We study the *SD-*  
11 *Mal* system in detail, exploring its components, chromosomal structure, and evolutionary history. Our  
12 findings reveal a recent chromosome-scale selective sweep mediated by strong epistatic selection for  
13 haplotypes carrying *Sd*, the main driving allele, and one or more factors within the double inversion. While  
14 most *SD-Mal* chromosomes are homozygous lethal, *SD-Mal* haplotypes can recombine with other,  
15 complementing haplotypes via crossing over and with wildtype chromosomes only via gene conversion.  
16 *SD-Mal* chromosomes have nevertheless accumulated lethal mutations, excess non-synonymous mutations,  
17 and excess transposable element insertions. Therefore, *SD-Mal* haplotypes evolve as a small, semi-isolated  
18 subpopulation with a history of strong selection. These results may explain the evolutionary turnover of *SD*  
19 haplotypes in different populations around the world and have implications for supergene evolution  
20 broadly.

21

22

## 23 **Introduction**

24

25 Supergenes are clusters of linked loci that control complex phenotypes. Some supergenes mediate adaptive  
26 polymorphisms that are generally maintained by some form of frequency- or density-dependent natural  
27 selection, as in, *e.g.*, mimicry in butterflies, self-incompatibility in plants, plumage polymorphisms in birds,  
28 and heteromorphic sex chromosomes (see SCHWANDER *et al.* 2014; THOMPSON AND JIGGINS 2014 for  
29 review). Other supergenes are maintained by selfish social behaviors that enhance the fitness of carriers at  
30 the expense of non-carriers, as in some ant species (KELLER AND ROSS 1998; WANG *et al.* 2013). Still other  
31 supergenes are maintained by their ability to achieve selfish, better-than-Mendelian transmission during  
32 gametogenesis, as in so-called meiotic drive complexes found in fungi, insects, and mammals (LYON 2003;  
33 LARRACUENTE AND PRESGRAVES 2012; LINDHOLM *et al.* 2016; SVEDBERG *et al.* 2018).

34

35 Meiotic drive complexes gain transmission advantages at the expense of other loci and their hosts. In  
36 heterozygous carriers of male drive complexes, the driver disables spermatids that bear drive-sensitive  
37 target alleles (LARRACUENTE AND PRESGRAVES 2012; LINDHOLM *et al.* 2016). To spread in the population,  
38 the driver must be linked in a *cis*-arrangement to a drive-resistant (insensitive) target allele  
39 (CHARLESWORTH AND HARTL 1978). Recombination between the driver and target results in a “suicide”  
40 haplotype that distorts against itself (SANDLER AND CARPENTER 1972; HARTL 1974). These epistatic  
41 interactions between driver and target lead to selection for modifiers of recombination that tighten linkage,  
42 such as chromosomal inversions (SCHWANDER *et al.* 2014; THOMPSON AND JIGGINS 2014;  
43 CHARLESWORTH 2016). Like most supergenes (TURNER 1967; CHARLESWORTH AND CHARLESWORTH  
44 1975), meiotic drive complexes originate from two or more loci with some degree of initial linkage.  
45 Successful drivers thus tend to be located in regions of low recombination, such as non-recombining sex  
46 chromosomes (HAMILTON 1967; HURST AND POMIANKOWSKI 1991), centromeric regions, or in  
47 chromosomal inversions of autosomes (LYON 2003; LARRACUENTE AND PRESGRAVES 2012; LINDHOLM  
48 *et al.* 2016; SVEDBERG *et al.* 2018).

49  
50 The short-term benefits of reduced recombination can entail long-term costs. Chromosomal inversions that  
51 lock supergene loci together also incidentally capture linked loci, which causes large chromosomal regions  
52 to segregate as blocks. Due to reduced recombination, the efficacy of natural selection in these regions is  
53 compromised: deleterious mutations can accumulate and beneficial ones are more readily lost (MULLER  
54 1964; HILL AND ROBERTSON 1968; FELSENSTEIN 1974). Many meiotic drive complexes are thus  
55 homozygous lethal or sterile. The degeneration of drive haplotypes is not however inevitable, as different  
56 drive haplotypes that complement one another (DOD *et al.* 2003; PRESGRAVES *et al.* 2009; BRAND *et al.*  
57 2015), they may be able to recombine, if only among themselves. Gene conversion from wildtype  
58 chromosomes may also ameliorate the genetic load of supergenes (UYENOYAMA 2005; WANG *et al.* 2013;  
59 TUTTLE *et al.* 2016; BRANCO *et al.* 2018; STOLLE *et al.* 2019; BRELSFORD *et al.* 2020). Male meiotic drive  
60 complexes thus represent a class of selfish supergenes that evolve and persist via the interaction of drive,  
61 recombination, and natural selection.

62  
63 Here we focus on the evolutionary genetics of *Segregation Distorter* (*SD*), a well-known autosomal meiotic  
64 drive complex in *Drosophila melanogaster* (SANDLER *et al.* 1959). In heterozygous males, *SD* disables  
65 sperm bearing drive-sensitive wildtype chromosomes via a chromatin condensation defect (HARTL *et al.*  
66 1967 ; TEMIN *et al.* 1991). *SD* has two main components: the driver, *Segregation distorter* (*Sd*), is a  
67 truncated duplication of the gene *RanGAP* located in chromosome arm 2L (POWERS AND GANETZKY 1991;  
68 MERRILL *et al.* 1999; KUSANO *et al.* 2001); and the target of drive, *Responder* (*Rsp*), is a block of satellite

69 DNA in the pericentromeric heterochromatin of *2R*. Previous studies of *SD* chromosomes have detected  
70 linked upward modifiers of drive, including *Enhancer of SD (E[SD])* on *2L* and several others on *2R*  
71 (SANDLER AND HIRAIZUMI 1960; MIKLOS 1972; GANETZKY 1977; HIRAIZUMI *et al.* 1980; BRITTNACHER  
72 AND GANETZKY 1984), but their molecular identities are unknown. *Sd-RanGAP* and *Rsp* straddle the  
73 centromere, a region of reduced recombination, and some *SD* chromosomes bear pericentric inversions that  
74 presumably further tighten linkage among these loci. Many *SD* chromosomes also bear paracentric  
75 inversions on *2R* (reviewed in LYTTLE 1991; LARRACUENTE AND PRESGRAVES 2012). Although  
76 recombination between paracentric inversions and the main components of *SD* is possible, their strong  
77 association implies a role for epistatic selection in the evolution of these supergenes (LARRACUENTE AND  
78 PRESGRAVES 2012).

79

80 While *SD* is present at low population frequencies (<5%) around the world (TEMIN *et al.* 1991;  
81 LARRACUENTE AND PRESGRAVES 2012), *Sd-RanGAP* appears to have originated in sub-Saharan Africa,  
82 the ancestral geographic range of *D. melanogaster* (PRESGRAVES *et al.* 2009; BRAND *et al.* 2015). The  
83 predominant *SD* variant in Africa is *SD-Mal*, which recently swept across the entire continent (PRESGRAVES  
84 *et al.* 2009; BRAND *et al.* 2015). *SD-Mal* has a pair of rare, African-endemic, overlapping paracentric  
85 inversions on *2R*: *In(2R)51B6-11;55E3-12* and *In(2R)44F3-12;54E3-10*, hereafter collectively referred  
86 to as *In(2R)Mal* (AULARD *et al.* 2002; PRESGRAVES *et al.* 2009). *SD-Mal* chromosomes are particularly  
87 strong drivers, with ~100% transmission. Notably, recombinant chromosomes bearing the *Sd-RanGAP*  
88 duplication from this haplotype but lacking the inversions do not drive (PRESGRAVES *et al.* 2009),  
89 suggesting that *In(2R)Mal* is essential for *SD-Mal* drive. We therefore expect strong epistatic selection to  
90 enforce the association of *Sd-RanGAP* and *In(2R)Mal*. The functional role of *In(2R)Mal* for drive is still  
91 unclear: do these inversions function to suppress recombination between *Sd-RanGAP* and a major distal  
92 enhancer on *2R*, or do they contain a major enhancer?

93

94 Here, we combine genetic and population genomic approaches to study *SD-Mal* haplotypes sampled from  
95 a single population in Zambia, the putative ancestral range of *D. melanogaster* (POOL *et al.* 2012). We  
96 address four issues. First, we reveal the structural features of the *SD-Mal* haplotype, including the  
97 organization of the insensitive *Rsp* allele and the *In(2R)Mal* rearrangements. Second, we characterize the  
98 genetic function of *In(2R)Mal* and its role in drive. Third, we infer the population genetic history of the  
99 rapid rise in frequency of *SD-Mal* in Zambia. And fourth, we explore the evolutionary consequences of  
100 reduced recombination on *SD-Mal* haplotypes. Our results show that *SD-Mal* experienced a recent  
101 chromosome-scale selective sweep mediated by epistatic selection and has, as a consequence of its reduced  
102 population recombination rate, accumulated excess non-synonymous mutations and transposable element

103 insertions. The *SD-Mal* haplotype is a supergene that evolves as a small, semi-isolated subpopulation in  
104 which complementing *SD-Mal* chromosomes can recombine *inter se* via crossing over and with wildtype  
105 chromosomes only via gene conversion. These results have implications for supergene evolution and may  
106 explain the enigmatic evolutionary turnover of *SD* haplotypes in different populations around the world.

107

## 108 **Results and discussion**

109

110 To investigate the evolutionary genomics of *SD-Mal*, we sequenced haploid embryos from nine driving  
111 *SD-Mal* haplotypes sampled from a single population in Zambia (BRAND *et al.* 2015), the putative ancestral  
112 range of *D. melanogaster* (POOL *et al.* 2012). Illumina read depth among samples ranged between ~46-67x,  
113 (Supplementary Table S1; BioProject PRJNA649752 in NCBI). Additionally, we obtained ~12x coverage  
114 with long-read Nanopore sequencing of one homozygous viable line, *SD-ZII25*, to create a *de novo*  
115 assembly of a representative *SD-Mal* haplotype. We use these data to study the evolution of *SD-Mal*  
116 structure, diversity, and recombination.

117

### 118 *Chromosomal features of the SD-Mal supergene*

119

120 The *SD-Mal* haplotype has at least three key features: the main drive locus, the *Sd-RanGAP* duplication on  
121 *2L*; an insensitive *Responder* (*Rsp<sup>i</sup>*) in *2R* heterochromatin; and the paracentric *In(2R)Mal* arrangement on  
122 chromosome *2R* (Figure 1). We used our long-read and short-read sequence data for *SD-ZII25* to confirm  
123 the structure of the duplication (Fig. 1a) and then validated features in the other *SD-Mal* haplotypes. All  
124 *SD-Mal* chromosomes have the *Sd-RanGAP* duplication at the same location as the parent gene on  
125 chromosome *2L* (see also BRAND *et al.* 2015). The *Rsp* locus, the target of *SD*, corresponds to a block of  
126 ~120-bp satellite repeats in *2R* heterochromatin (Fig. 1b; WU *et al.* 1988). The reference genome, *Iso-1*,  
127 has a *Rsp<sup>s</sup>* allele corresponding to a primary *Rsp* locus containing two blocks of tandem *Rsp* repeats—*Rsp-*  
128 *proximal* and *Rsp-major*— with ~1000 copies of the *Rsp* satellite repeat interrupted by transposable  
129 elements (KHOST *et al.* 2017). A small number of *Rsp* repeats exist outside of the primary *Rsp* locus,  
130 although they are not known to be targeted by *SD*. There are three of these additional *Rsp* loci in *Iso-1*: ~10  
131 copies in *2R*, distal to the major *Rsp* locus (*Rsp-minor*); a single copy at the distal end of *2R* (60A); and ~12  
132 copies in *3L* (HOUTCHENS AND LYTTLE ; LARRACUENTE 2014; KHOST *et al.* 2017). The genomes of *SD*  
133 flies carry ~20 copies of *Rsp* (WU *et al.* 1988; PIMPINELLI AND DIMITRI 1989), but the organization of the  
134 primary *Rsp* locus on *SD* chromosomes is unknown. To characterize the *Rsp* locus of the *SD-Mal* haplotype,  
135 we mapped *SD-Mal* reads to an *Iso-1* reference genome (see KHOST *et al.* 2017). As expected, reads from  
136 *Iso-1* reference are distributed across the whole *Rsp-major* region. For *SD-Mal* chromosomes, however,

137 very few reads map to the *Rsp* repeats at the *Rsp-major* (Fig. 1b). This suggests that all *SD-Mal* have a  
 138 complete deletion of the primary *Rsp* locus containing *Rsp-proximal* and *Rsp-major* and that the only *Rsp*  
 139 copies in the *SD-Mal* genomes are the minor *Rsp* loci in chromosomes 2R and 3L (Suppl. Fig. S1).

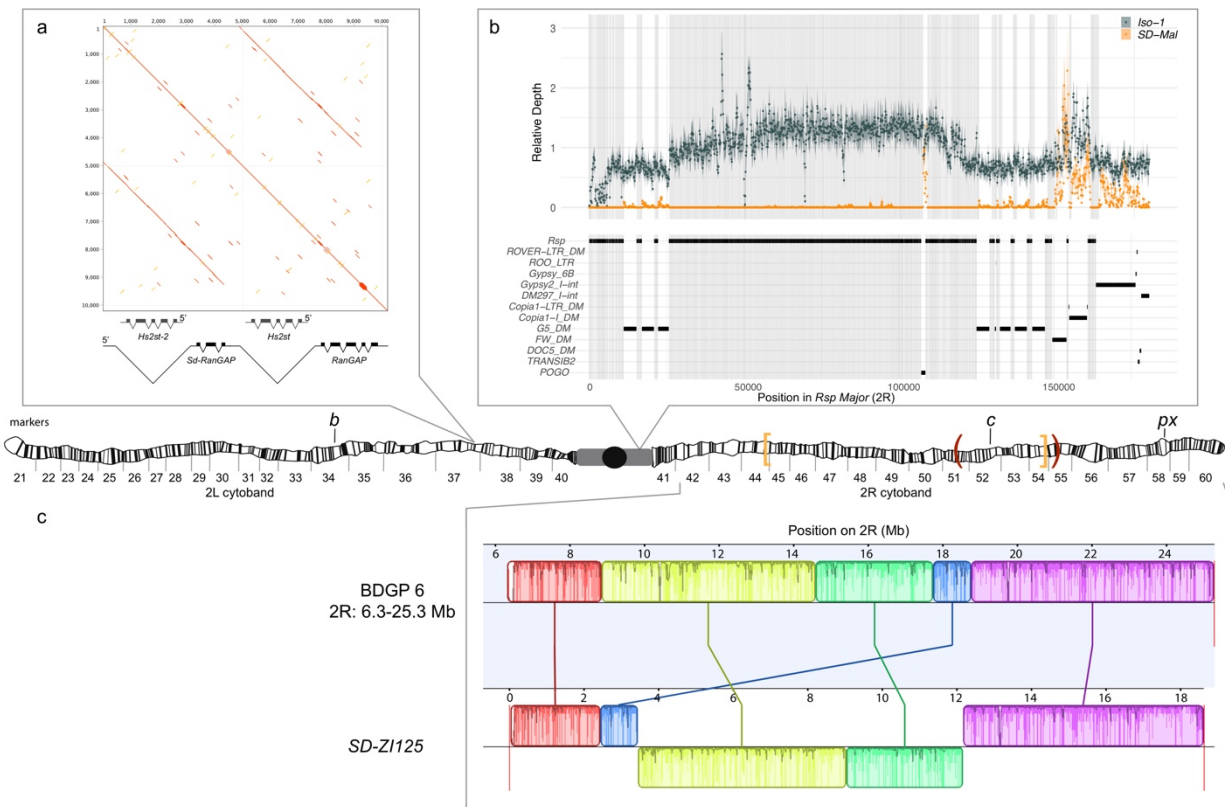

140  
 141 **Figure 1.** Map depicting the chromosomal features of the *SD-Mal* chromosome. The schematic shows the  
 142 cytogenetic map of chromosomes 2L and 2R (redrawn based on images in (LEFEVRE 1976)) and the major  
 143 features of the chromosome. (a) Dotplot showing that the *Sd* locus is a partial duplication of the gene  
 144 *RanGAP* (in black), located at band 37D2-6. (b) The *Rsp-major* locus is an array of tandem repeats located  
 145 in the pericentric heterochromatin (band *h39*). Read mapping shows that *SD-Mal* chromosomes do not have  
 146 any *Rsp* repeats in the *Rsp-major* locus, consistent with being insensitive to distortion by *Sd* (*Rsp<sup>d</sup>*) (orange,  
 147 high relative coverage regions correspond to transposable element interspersed), in contrast with *Iso-1*,  
 148 which is sensitive (*Rsp<sup>s</sup>*). (c) Two paracentric, overlapping inversions constitute the *In(2R)Mal*  
 149 arrangement: *In(2R)51BC;55E* (*In(2R)Mal-p*) in orange brackets and *In(2R)44F;54E* (*In(2R)Mal-d*) in red  
 150 parentheses). Pericentromeric heterochromatin and the centromere are represented by a grey rectangle and  
 151 black circle, respectively. Our assembly based on long-read sequencing data provide the exact breakpoints  
 152 of *In(2R)Mal* and confirms that the distal inversion (*Dmel.r6*, 2R:14,591,034-18,774,475) occurred first,  
 153 and the proximal inversion (*Dmel.r6*, 2R:8,855,601-15,616,195) followed, overlapping ~1Mb with the  
 154 distal inversion. The colored rectangles correspond to locally collinear blocks of sequence. Blocks below  
 155 the center black line indicate regions that align in the reverse complement orientation. Vertical red lines  
 156 indicate the end of the assembled chromosomes. Visible marker locations used for generating recombinants  
 157 (*b* (34D1), *c* (52D1), and *px* (58E4-58E8)) are indicated on the cytogenetic map.

158



159 The complex *In(2R)Mal* inversion is distal to the *Rsp* locus on chromosome 2R (Fig 1c). We used our *SD-*  
160 *ZII25* assembly to determine the precise breakpoints of these inversions. Relative to the standard *D.*  
161 *melanogaster* 2R scaffold (BDGP6), *SD-ZII25* has three large, rearranged blocks of sequence  
162 corresponding to *In(2R)Mal* (Fig. 1c): a 1.03-Mb block collinear with the reference but shifted proximally;  
163 a second inverted 5.74-Mb block; and a third inverted 3.16-Mb block. From this organization, we infer that  
164 the distal inversion, which we refer to as *In(2R)Mal-d*, occurred first and spanned 4.18 Mb (approx.  
165 2R:14,591,003-18,774,475). The proximal inversion, which we refer to as *In(2R)Mal-p*, occurred second  
166 and spanned 6.76 Mb, with 1.02 Mb overlapping with the proximal region of *In(2R)Mal-d* (approx.  
167 2R:8,855,602- 17,749,310; see Suppl. Fig. S2). All four breakpoints of the *In(2R)Mal* rearrangement  
168 involve simple joins of unique sequence. Three of these four breakpoints span genes: *sns* (2R:8,798,489 -  
169 8,856,091), *CG10931* (2R:17,748,935 -17,750,136), and *Mctp* (2R:18,761,758 - 18,774,824). The CDSs of  
170 both *sns* and *Mctp* remain intact in the *In(2R)Mal* arrangement, with the inversion disrupting their 3'UTRs.  
171 Neither of these two genes is expressed in testes (<https://flybase.org/reports/FBgn0024189>;  
172 <https://flybase.org/reports/FBgn0034389>; CHINTAPALLI *et al.* 2007; FB2021\_06; LARKIN *et al.* 2021), so  
173 it is unlikely that they are related to drive. *In(2R)Mal-p* disrupted the CDS of *CG10931*, which is a histone  
174 methyltransferase with high expression levels in testis (<https://flybase.org/reports/FBgn0034274>;  
175 CHINTAPALLI *et al.* 2007; FB2021\_06; LARKIN *et al.* 2021). Future work is required to determine if this  
176 gene has a role in the *SD-Mal* drive phenotype.

177  
178 In African populations, *In(2R)Mal* appears essential for *SD* drive: recombinant chromosomes bearing *Sd*  
179 but lacking *In(2R)Mal* do not drive (PRESGRAVES *et al.* 2009; BRAND *et al.* 2015). The functional role of  
180 *In(2R)Mal* in drive is however unclear. As expected, *In(2R)Mal* suppresses recombination: in crosses  
181 between a multiply marked chromosome 2, *b c px*, and *SD-Mal*, we find that *In(2R)Mal* reduces the *b - c*  
182 genetic distance by 54.6% (from 26.6 to 11.8 cM) and the *c - px* genetic distance by 92.4% (from 23.2 to  
183 1.8 cM), compared with control crosses between *b c px* and Oregon-R. Our crosses also confirm that  
184 *In(2R)Mal* is indeed required for drive: all *Sd*, *In(2R)Mal* haplotypes show strong drive (Table 1, rows 1  
185 and 2), whereas none of the recombinants that separate *Sd* and *In(2R)Mal* drive (Table 1, rows 3 and 4).  
186 We conclude that *SD-Mal* drive requires both *Sd* and *In(2R)Mal*, which implies that one or more essential  
187 enhancers, or co-drivers, is located within or distal to *In(2R)Mal*.

188  
189  
190  
191  
192

193  
194  
195  
196

**Table 1.** Strength of segregation distortion in recombinants of *SD-ZII25*.

|   | <b>Genotype</b>                                        | <b>Markers</b>   | <b><i>N</i></b> | <b><i>n</i></b> | <b>+/- <i>SE</i></b> | <b><i>k</i></b> | <b>+/- <i>SE</i></b> | <b><i>k</i><sup>*</sup></b> | <b>+/- <i>SE</i></b> | <b><i>p</i>-value<br/>(<i>k</i><sup>*</sup> = 0.5)</b> |
|---|--------------------------------------------------------|------------------|-----------------|-----------------|----------------------|-----------------|----------------------|-----------------------------|----------------------|--------------------------------------------------------|
| 1 | <i>Sd,In(2R)Mal</i>                                    | +++; <i>b</i> ++ | 112             | 90.3            | 6.03                 | 0.99            | 0.00                 | 0.98                        | 0.00                 | < 0.0001                                               |
| 2 | <i>Sd,In(2R)Mal</i>                                    | ++ <i>px</i>     | 71              | 118.8           | 9.48                 | 0.97            | 0.01                 | 0.96                        | 0.01                 | < 0.0001                                               |
| 3 | <i>Sd,In(2R)Mal</i> <sup>+</sup>                       | + <i>c px</i>    | 19              | 147.6           | 14.39                | 0.54            | 0.01                 | 0.51                        | 0.01                 | 0.3082                                                 |
| 4 | <i>Sd</i> <sup>+</sup> , <i>In(2R)Mal</i>              | <i>b</i> ++      | 24              | 124.8           | 10.31                | 0.68            | 0.02                 | 0.55                        | 0.03                 | 0.0572                                                 |
| 5 | <i>Sd</i> <sup>+</sup> , <i>In(2R)Mal</i> <sup>+</sup> | + <i>c px</i>    | 65              | 120.4           | 8.32                 | 0.53            | 0.01                 | 0.51                        | 0.01                 | 0.3586                                                 |

Chromosome 2 markers are *black* (*b*), *curved* (*c*), and *plexus* (*px*). *N*, number of crosses; *n*, average number of progeny from the crosses; *SE*, standard error; *k*, average proportion of progeny inheriting the partial *SD<sub>r</sub>* chromosome from *SD<sub>r</sub>/bcpx* males; *k*<sup>\*</sup>, average proportion of progeny inheriting the partial *SD<sub>r</sub>* chromosome from *SD<sub>r</sub>/bcpx* males, corrected for viability. *P*-values reported by a single sample t-test with a null hypothesis of *k*<sup>\*</sup>=0.5, as expected for Mendelian segregation.

197  
198  
199  
200  
201  
202  
203  
204  
205  
206  
207  
208  
209  
210  
211  
212

The temporal order of inversions (first *In(2R)Mal-d*, then *In(2R)Mal-p*) suggests two possible scenarios. *In(2R)Mal-d*, occurring first, may have captured the essential enhancer, with the subsequent *In(2R)Mal-p* serving to further reduce recombination between *Sd* and the enhancer. Alternatively, an essential enhancer is located distal to *In(2R)Mal-d*, and the role of both *In(2R)Mal* inversions is to reduce recombination with *Sd*. To distinguish these possibilities, we measured drive in *b*<sup>+</sup> *Sd* *c*<sup>+</sup> *In(2R)Mal px* recombinants, which bear *Sd* and *In(2R)Mal* but recombine between the distal breakpoint of *In(2R)Mal* (2R: 18,774,475) and *px* (2R: 22,494,297). All of these recombinants show strong drive (*n*=71; Table 1, row 2). Assuming that recombination is uniformly distributed throughout the 3.72-Mb interval between the *In(2R)Mal-d* distal breakpoint and *px*, the probability of failing to separate an essential codriver or distal enhancer among any of our 71 recombinants is <0.014. Furthermore, using molecular markers, we detected two recombinants within 100 kb of the distal breakpoint of *In(2R)Mal*, both with strong drive (*k*>0.99). We therefore infer that the co-driver likely resides within the *In(2R)Mal* arrangement. More specifically, we speculate that the *In(2R)Mal-d* inversion both captured the co-driver and reduced recombination with *Sd*, whereas *In(2R)Mal-p* tightened linkage between centromere-proximal components of *SD-Mal* and *In(2R)Mal-d*.



213 While recombination occurs readily between *Sd* and the proximal break of *In(2R)Mal* (Table 1;  
214 PRESGRAVES *et al.* 2009; BRAND *et al.* 2015), long-range linkage disequilibrium nevertheless exists  
215 between *Sd* and *In(2R)Mal*. Using 204 haploid genomes from Zambia (LACK *et al.* 2016; see Methods), we  
216 identified 198 wildtype haplotypes ( $Sd^+ In(2R)Mal^+$ ), 3 *SD-Mal* haplotypes ( $Sd In(2R)Mal$ ), 3 recombinant  
217 haplotypes (all  $Sd In(2R)Mal^+$ , none  $Sd^+ In(2R)Mal$ ). Despite the individually low frequencies of *Sd*  
218 (frequency = 0.0294) and *In(2R)Mal* (frequency = 0.0147), they tend to co-occur on the same haplotypes  
219 (Fisher's exact  $P=1.4 \times 10^{-5}$ ). Given a conservative recombination frequency between *Sd* and *In(2R)Mal* of  
220  $\sim 5$  cM (FlyBase; FB2021\_06; LARKIN *et al.* 2021), the observed estimated coefficient of linkage  
221 disequilibrium,  $D = 0.0143$ , has a half-life of just  $\sim 14$  generations (1.4 years, assuming 10 generations per  
222 year) and should decay to negligible within 100 generations (10 years). We therefore conclude that strong  
223 epistatic selection maintains the *SD-Mal* supergene haplotype.

224

#### 225 *Rapid increase in frequency of the SD-Mal supergene*

226 We used population genomics to infer the evolutionary history and dynamics of *SD-Mal* chromosomes. We  
227 called SNPs in our Illumina reads from nine complete *SD-Mal* haplotypes from Zambia (see Methods). For  
228 comparison, we also analyzed wildtype ( $SD^+$ ) chromosomes from the same population in Zambia (LACK *et*  
229 *al.* 2016), including those with chromosome 2 inversions: 10 with the *In(2L)t* inversion and 10 with the  
230 *In(2R)NS* inversion (see Methods). Table 2 shows that nucleotide diversity ( $\pi$ ) is significantly lower on *SD-*  
231 *Mal* haplotypes compared to uninverted  $SD^+$  chromosome arms (Table 2, rows 1 and 4; Figure 2a). The  
232 relative reduction in diversity on *SD-Mal* haplotypes is distributed heterogeneously:  $\pi$  is sharply reduced  
233 for a large region that spans  $\sim 25.8$  Mb, representing 53% of chromosome 2 and extending from *Sd-RanGAP*  
234 on *2L* (*2L*: 19,441,959; Suppl. Fig. S3), across the centromere, and to  $\sim 2.9$  Mb beyond the distal breakpoint  
235 of *In(2R)Mal* (*2R*: 18,774,475; Table 2, rows 3, 5 and 6; Fig. 2a). Thus, the region of reduced nucleotide  
236 diversity on *SD-Mal* chromosomes covers all of the known essential loci for the drive phenotype: *Sd-*  
237 *RanGAP*, *Rsp<sup>i</sup>* and *In(2R)Mal*.

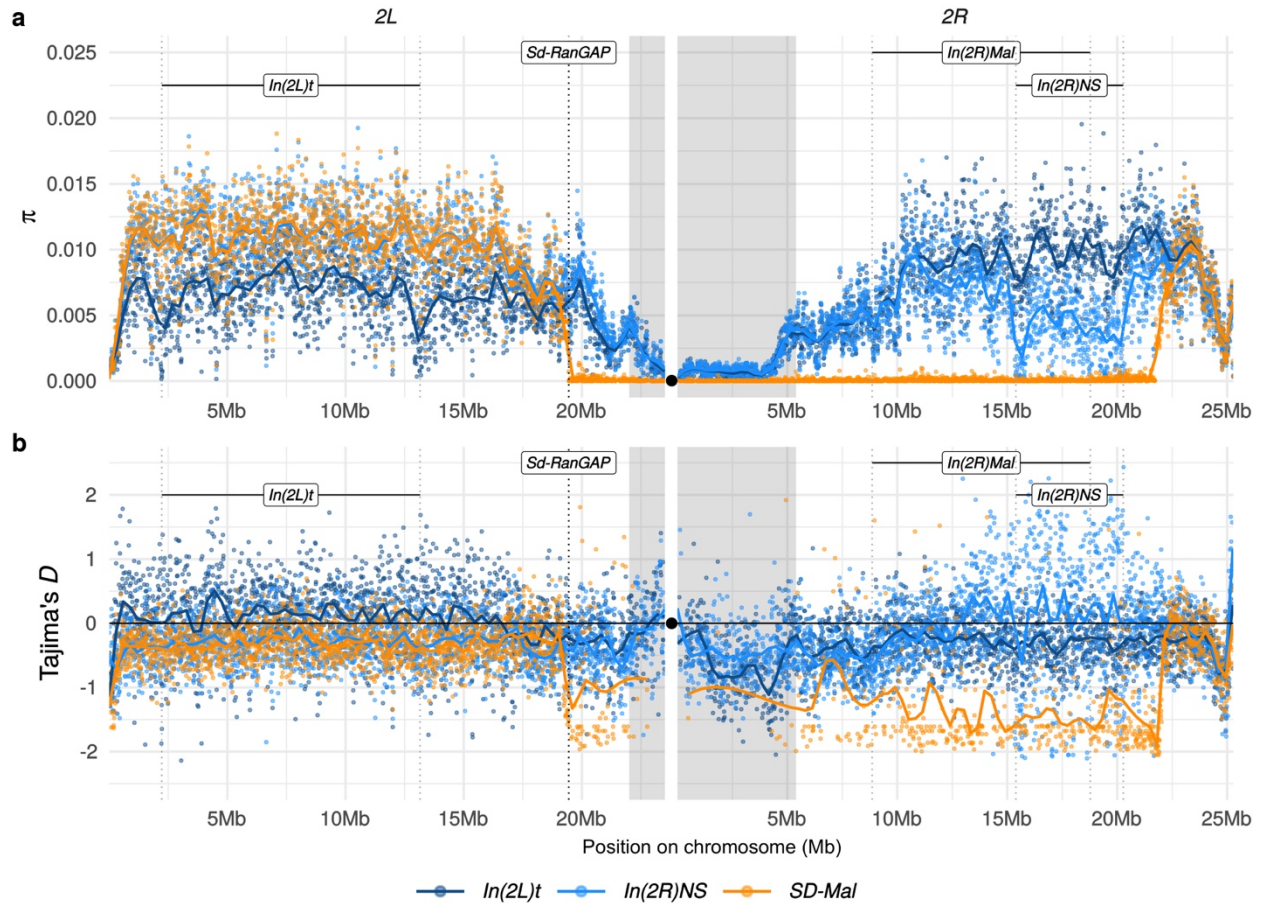

238

239 **Figure 2.** Diversity on *SD-Mal* chromosomes. (a) Average pairwise nucleotide diversity per site ( $\pi$ ) and (b)  
240 Tajima's  $D$  estimates in non-overlapping 10-kb windows along chromosome 2, in Zambian *SD-Mal*  
241 chromosomes ( $n=9$ , orange) and  $SD^+$  chromosomes from the same population, bearing the cosmopolitan  
242 inversions *In(2L)t* ( $n=10$ , dark blue) and *In(2R)NS* ( $n=10$ , light blue). Regions corresponding to pericentric  
243 heterochromatin are shaded in grey and the centromere location is marked with a black circle. *SD-Mal*  
244 chromosomes show a sharp decrease in nucleotide diversity and skewed frequency spectrum from the *Sd*  
245 locus (*Sd-RanGAP*, 2L:19.4Mb) to ~2.9 Mb beyond the distal breakpoint of *In(2R)Mal*.

246

247

**Table 2.** Nucleotide diversity ( $\pi$ ) on *SD-Mal* and *SD*<sup>+</sup> chromosomes.

| Chr. | Region                             | $\pi$ (+/- st.dev)         |                            |                                   | p-value                                  |                                                     |
|------|------------------------------------|----------------------------|----------------------------|-----------------------------------|------------------------------------------|-----------------------------------------------------|
|      |                                    | <i>SD</i> <sup>+</sup>     | <i>SD-Mal</i>              | <i>SD</i> <sup>+</sup> × <i>f</i> | <i>SD-Mal</i> vs. <i>SD</i> <sup>+</sup> | <i>SD-Mal</i> vs. <i>SD</i> <sup>+</sup> × <i>f</i> |
| 1    | 2L Whole arm                       | 9.41E-03<br>(+/- 3.65E-03) | 8.69E-03<br>(+/- 4.63E-03) | 1.38E-04<br>(+/- 5.36E-05)        | 2.68E-08                                 | 0.00E+00                                            |
| 2    | 2L Distal to<br><i>Sd-RanGAP</i>   | 1.03E-02<br>(+/- 3.01E-03) | 1.03E-02<br>(+/- 3.09E-03) | 1.52E-04<br>(+/- 4.43E-05)        | 0.5727                                   | 0.00E+00                                            |
| 3    | 2L Proximal to<br><i>Sd-RanGAP</i> | 4.44E-03<br>(+/- 2.75E-03) | 9.39E-05<br>(+/- 1.66E-04) | 6.52E-05<br>(+/- 4.04E-05)        | 5.84E-90                                 | 0.0027                                              |
| 4    | 2R Whole arm                       | 6.96E-03<br>(+/- 4.03E-03) | 1.11E-03<br>(+/- 2.73E-03) | 1.02E-04<br>(+/- 5.93E-05)        | 0.00E+00                                 | 2.82E-63                                            |
| 5    | 2R <i>In(2R)Mal</i>                | 8.94E-03<br>(+/- 2.95E-03) | 7.97E-05<br>(+/- 1.18E-04) | 1.31E-04<br>(+/- 4.33E-05)        | 0.00E+00                                 | 1.42E-33                                            |
| 6    | 2L-2R <i>SD-Mal</i><br>supergene   | 6.42E-03<br>(+/- 4.03E-03) | 7.98E-05<br>(+/- 1.32E-04) | 9.43E-05<br>(+/- 5.92E-05)        | 0.00E+00                                 | 2.60E-06                                            |

Average nucleotide diversity ( $\pi$ ) per nucleotide and standard deviation estimated in 10-kb windows along chromosome 2, for *SD*<sup>+</sup>, *SD-Mal* and *SD*<sup>+</sup> scaled by the estimated frequency of *SD-Mal* chromosomes (*SD*<sup>+</sup> × *f*; *f* = 1.47%). *P*-values reported by paired t-test between 10 kb windows.

248

249

250 The reduced nucleotide diversity among *SD-Mal* may not be surprising, given its low frequency in natural  
251 populations (see below; PRESGRAVES *et al.* 2009; BRAND *et al.* 2015). *SD* persists at low frequencies in  
252 populations worldwide, presumably reflecting the balance between drive, negative selection, and genetic  
253 suppression and/or resistance (HARTL 1975; CHARLESWORTH AND HARTL 1978; LARRACUENTE AND  
254 PRESGRAVES 2012). If the *SD-Mal* supergene has been maintained at stable drive-selection-suppression  
255 equilibrium frequency for a long period of time, then its neutral nucleotide diversity may reflect a mutation-  
256 drift equilibrium appropriate for its effective population size. Under this scenario, we expect diversity at  
257 the supergene to be similar to wild type (*SD*<sup>+</sup>) diversity scaled by the long-term equilibrium frequency of  
258 *SD*. We estimated *SD-Mal* frequency to be 1.47% by identifying the *Sd* duplication and *In(2R)Mal*  
259 breakpoints in 204 haploid genomes from Zambia (3/204, comparable to PRESGRAVES *et al.* 2009; BRAND  
260 *et al.* 2015; data from LACK *et al.* 2016; see Methods). To approximate our expectation under mutation-  
261 drift equilibrium, we scaled average  $\pi$  from the *SD*<sup>+</sup> sample by 1.47% in 10-kb windows across the region

262 corresponding to the *SD-Mal* supergene, defined as the region from *Sd-RanGAP* to the distal breakpoint of  
263 *In(2R)Mal*. Table 2 (row 6) shows that diversity in the *SD-Mal* supergene region is still significantly lower  
264 than expected, suggesting that the low frequency of *SD-Mal* cannot fully explain its reduced diversity. This  
265 observation suggests two possibilities: the *SD-Mal* supergene historically had an equilibrium frequency less  
266 than 1.47% in Zambia; or the *SD-Mal* supergene, having reduced recombination, has experienced  
267 hitchhiking effects due to background selection and/or a recent selective sweep.

268

269 To distinguish between these possibilities, we analyzed summaries of the site frequency spectrum. We find  
270 strongly negative Tajima's  $D$  mirroring the distribution of reduced diversity, indicating an excess of rare  
271 alleles (Figure 2b). Such a skew in the site frequency spectrum suggests a recent increase in frequency of  
272 the *SD-Mal* supergene in Zambia. The high differentiation of *SD-Mal* from  $SD^+$  chromosomes from the  
273 same population similarly suggests a large shift in allele frequencies. Wright's fixation index,  $F_{ST}$ , in the  
274 *SD-Mal* supergene region is unusually high for chromosomes from the same population (Figure 3a). Neither  
275 of the  $SD^+$  chromosomes with cosmopolitan inversions show such high differentiation within their  
276 inversions, and mean nucleotide differences ( $d_{XY}$ ) between *SD-Mal* and  $SD^+$  is comparable to the other  
277 inversions, implying that the differentiation of the *SD-Mal* supergene is recent. Our results are thus  
278 consistent with a rapid increase in frequency of the *SD-Mal* haplotype that reduced nucleotide diversity  
279 within *SD-Mal* and generated large differences in allele frequencies with  $SD^+$  chromosomes.

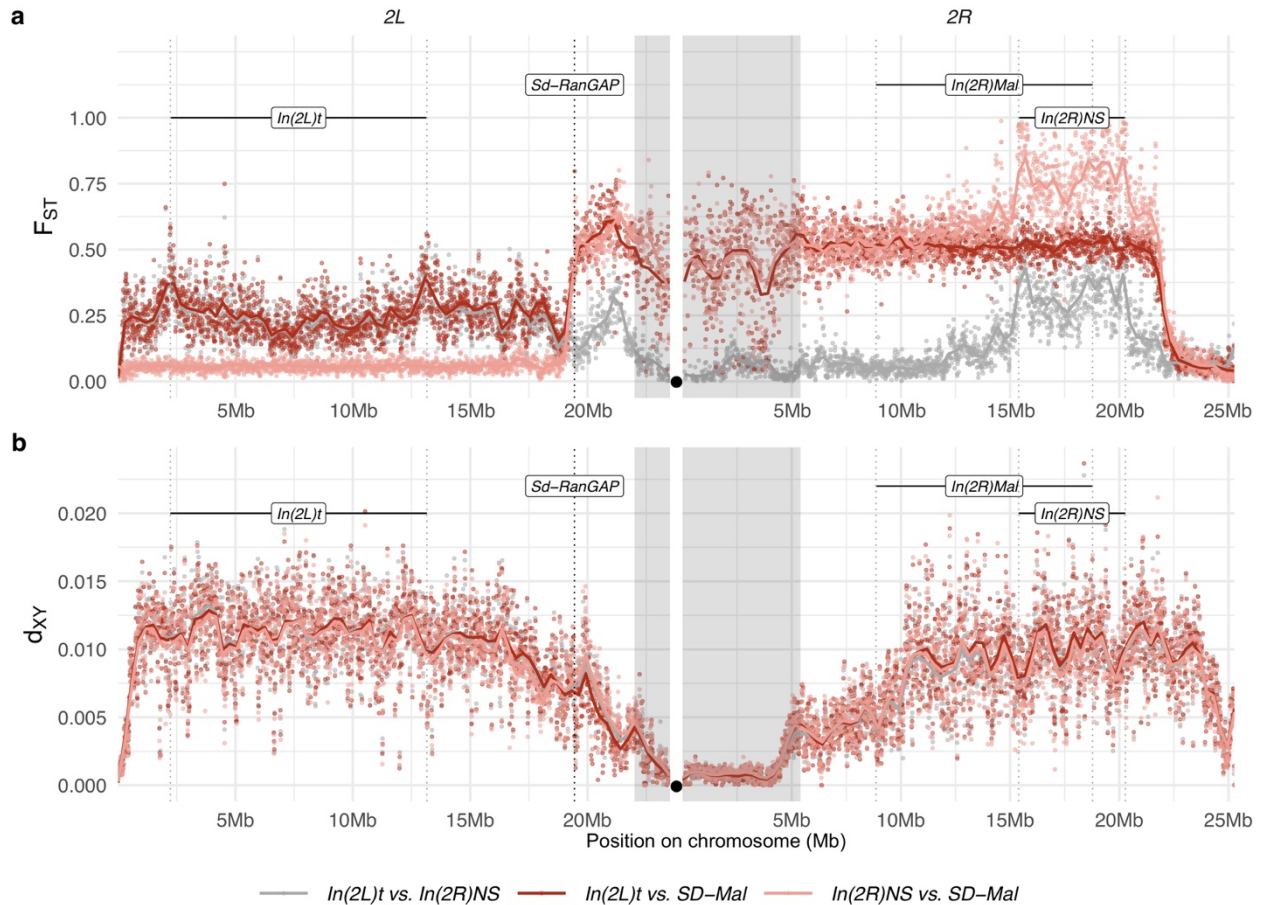

280

281 **Figure 3.** Differentiation between *SD-Mal* and wildtype chromosomes. (a) Pairwise  $F_{ST}$  and (b)  $d_{XY}$  per  
 282 base pair in non-overlapping 10-kb windows along chromosome 2, between Zambian *SD-Mal* haplotypes  
 283 ( $n=9$ ) and wildtype chromosomes from the same population, bearing the cosmopolitan inversions  $In(2L)t$   
 284 ( $n=10$ ) and  $In(2R)NS$  ( $n=10$ ). Regions corresponding to pericentric heterochromatin are shaded in grey and  
 285 the centromere location is marked with a black circle.

286

287

288 To estimate the timing of the recent expansion of the *SD-Mal* supergene, we used an Approximate Bayesian  
 289 Computation (ABC) method with rejection sampling in neutral coalescent simulations. We do not know if  
 290 *SD* chromosomes acquired  $In(2R)Mal$  in Zambia or if the inversions occurred *de novo* on an *SD*  
 291 background. For our simulations, we assume that the acquisition of these inversion(s) was a unique event  
 292 that enhanced drive strength and/or efficiency. Under this scenario, extant *SD-Mal* chromosomes have a  
 293 single origin. We therefore simulated this history in a coalescent framework as an absolute bottleneck to a  
 294 single chromosome. We performed simulations considering a sample size of  $n = 9$  and assumed no  
 295 recombination in the  $\sim 9.92$ -Mb region of  $In(2R)Mal$ . We simulated with values of  $S$  drawn from a uniform  
 296 distribution  $\pm 5\%$  of the observed number of segregating sites in  $In(2R)Mal$ . We considered a prior uniform



297 distribution of the time of the expansion ( $t$ ) ranging from 0 to  $4N_e$  generations (0 – 185,836 years ago),  
298 assuming that *D. melanogaster*  $N_e$  in Zambia 3,160,475 (KAPOPOULOU *et al.* 2018), a *In(2R)Mal* frequency  
299 of 1.47%, and 10 generations per year (LI AND STEPHAN 2006; THORNTON AND ANDOLFATTO 2006;  
300 LAURENT *et al.* 2011; KAPOPOULOU *et al.* 2018). Using the ABC with rejection sampling conditional on  
301 our observed estimates of  $\pi$  and Tajima's  $D$  for *In(2R)Mal* ( $\pi_{In(2R)Mal} = 760.49$ ,  $D = -1.27$ ; note that  $\pi_{In(2R)Mal}$   
302 is an overall, unscaled estimate of nucleotide diversity for the whole *In(2R)Mal* region), we infer that the  
303 *SD-Mal* expansion began  $\sim 0.096$  (95% credibility intervals 0.092 - 0.115)  $\times 4N_e$  generations ago or,  
304 equivalently,  $\sim 1792$  years ago (0.88% rejection sampling acceptance rate; Figure 4). To account for possible  
305 gene conversion (see below), we discarded SNPs shared with *SD*<sup>+</sup> chromosomes (see below), and  
306 recalculated  $\pi$  and Tajima's  $D$  using only private SNPs ( $\pi_{In(2R)Mal} = 563.34$ ,  $D = -1.41$ ). Based on these  
307 parameters, the estimated *SD-Mal* expansion occurred  $\sim 0.0737$  (95% credibility intervals 0.070 - 0.092)  
308  $4N_e$  generations ago,  $\sim 1368$  years (0.86% rejection sampling acceptance rate Figure 4). To calculate the  
309 posterior probability of the model, we performed 100,000 simulations under a model assuming a stable  
310 frequency of *SD-Mal* and under sweep models (assuming  $t_{all} = 0.096$  and  $t_{shared\_excl} = 0.0737$ ) (Suppl. Fig.  
311 S4). The simulated data are inconsistent with a long-term stable frequency of *SD-Mal* (All SNPs,  $p_\pi =$   
312 0.0526,  $p_D = 0.1084$ ; Private,  $p_\pi = 0.0285$ ,  $p_D = 0.0755$ ). Instead, our simulations suggest that a recent  
313 selective sweep is more consistent with the data (All SNPs,  $p_\pi = 0.3106$ ,  $p_D = 0.5929$ ; Private,  $p_\pi = 0.3091$ ,  
314  $p_D = 0.6092$ ). Taken together, evidence from nucleotide diversity, the site frequency spectrum, population  
315 differentiation, and coalescent simulations suggest a rapid non-neutral increase in frequency of the *SD-Mal*  
316 supergene that began  $< 2,000$  years ago.  
317



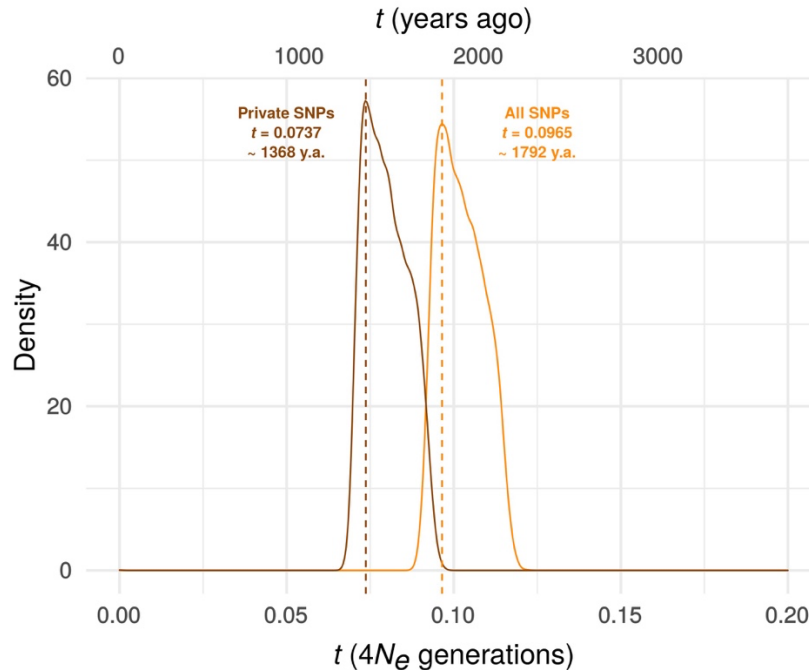

318

319 **Figure 4.** Estimating the time since the *SD-Mal* selective sweep. ABC estimates based on 10,000 posterior  
320 samples place the onset of the selective sweep between 0.096 (95% C.I. 0.092 - 0.115) and 0.0737 (0.070 -  
321 0.092)  $\times 4 N_e$  generations, i.e.  $\sim 1,368$ - $1,792$  years ago, considering recent estimates of  $N_e$  in Zambia from  
322 (KAPOPOULOU *et al.* 2018), frequency of *SD-Mal* in Zambia 1.47% and 10 generations per year). Estimates  
323 were done considering only *In(2R)Mal*, where crossing over is rare and only occurs between *SD-Mal*  
324 chromosomes using all SNPs and excluding shared SNPs in order to account for gene conversion from *SD*<sup>+</sup>  
325 chromosomes.

326

327 The sweep signal on the *SD-Mal* haplotypes begins immediately distal to *Sd-RanGAP* on *2L* and extends  
328  $\sim 3$  Mb beyond the distal boundary of *In(2R)Mal* on *2R*. To understand why the sweep extends so far beyond  
329 the *In(2R)Mal-d* distal breakpoint, we consider three, not mutually exclusive, possibilities. First,  
330 chromosomal inversions can suppress recombination  $\sim 1$ - $3$  Mb beyond their breakpoints (STEVISSON *et al.*  
331 2011; MILLER *et al.* 2016; CROWN *et al.* 2018; MILLER *et al.* 2018), extending the size of the sweep signal.  
332 To determine the extent of recombination suppression caused by *In(2R)Mal*, we estimated recombination  
333 rates in the region distal to the inversion. The expected genetic distance between the distal breakpoint of  
334 *In(2R)Mal* (*2R*: 18.77 Mb) and *px* (*2R*: 22.49 Mb) is  $\sim 13.87$  cM (FISTON-LAVIER *et al.* 2010). Measuring  
335 recombination between *SD-Mal* and standard arrangement chromosomes for the same (collinear) interval,  
336 we estimate a genetic distance of  $\sim 1.76$  (see above), an 87.3% reduction. *In(2R)Mal* strongly reduces  
337 recombination beyond its bounds. Second, although we have inferred that the essential enhancer resides  
338 within the *In(2R)Mal* inversion (see above), we have not excluded the possibility of weak enhancers distal  
339 to the inversion which might contribute to the sweep signal. We find that *SD-Mal* chromosomes with  
340 *In(2R)Mal*-distal material recombined away (*b*<sup>+</sup> *Sd* *c*<sup>+</sup> *In(2R)Mal px*) have modestly but significantly lower

341 drive strength ( $k = 0.96$  versus  $0.98$ ; Table 1, lines 1-2), suggestive of one or more weak distal enhancers.  
342 Third, there may be mutations distal to *In(2R)Mal* that contribute to the fitness of *SD-Mal* haplotypes but  
343 without increasing the strength of drive, e.g., mutations that compensate for the effects of *SD-Mal*-linked  
344 deleterious mutations.

345

346

#### 347 *Recombination on SD supergenes*

348 While nearly all *SD-Mal* haplotypes are individually homozygous lethal and do not recombine with wild  
349 type chromosomes in and around *In(2R)Mal*, ~90% of pairwise combinations of different *SD-Mal*  
350 chromosomes ( $SD_i/SD_j$ ) are viable and fertile in complementation tests (PRESGRAVES *et al.* 2009; BRAND  
351 *et al.* 2015). Therefore, recombination may occur between *SD-Mal* chromosomes in  $SD_i/SD_j$  heterozygous  
352 females. To determine if *SD-Mal* chromosomes recombine, we estimated mean pairwise linkage  
353 disequilibrium ( $r^2$ ) between SNPs located within the *In(2R)Mal* arrangement. We found that mean  $r^2$   
354 between pairs of SNPs declines as a function of the physical distance separating them (Figure 5a), a  
355 hallmark of recombination via crossing over (HILL AND ROBERTSON 1968; MIYASHITA AND LANGLEY  
356 1988; SCHAEFFER AND MILLER 1993; AWADALLA *et al.* 1999; CONWAY *et al.* 1999). Pairwise LD is higher  
357 and extends further in *In(2R)Mal* than in the equivalent region of  $SD^+$  chromosomes or in any of the other  
358 two cosmopolitan inversions, *In(2L)t* and *In(2R)NS* (Figure 5a). This pattern is not surprising: the low  
359 frequency of *SD-Mal* makes  $SD_i/SD_j$  genotypes, and hence the opportunity for recombination, rare. To  
360 further characterize the history of recombination between *SD-Mal* haplotypes, we used 338 non-singleton,  
361 biallelic SNPs in *In(2R)Mal* to trace historical crossover events. From these SNPs, we estimate that  $R_m$   
362 (HUDSON AND KAPLAN 1985), the minimum number of recombination events, in this sample of *SD-Mal*  
363 haplotypes is 15 (Figure 5c). Thus, assuming that these *SD-Mal* haplotypes are ~17,929 generations old  
364 (Figure 4), we estimate that recombination events between *SD-Mal* haplotypes occur a minimum of once  
365 every ~1,195 generations. We can thus confirm that crossover events are relatively rare, likely due to the  
366 low population frequency of *SD-Mal* and the possibly reduced fitness of  $SD_i/SD_j$  genotypes.

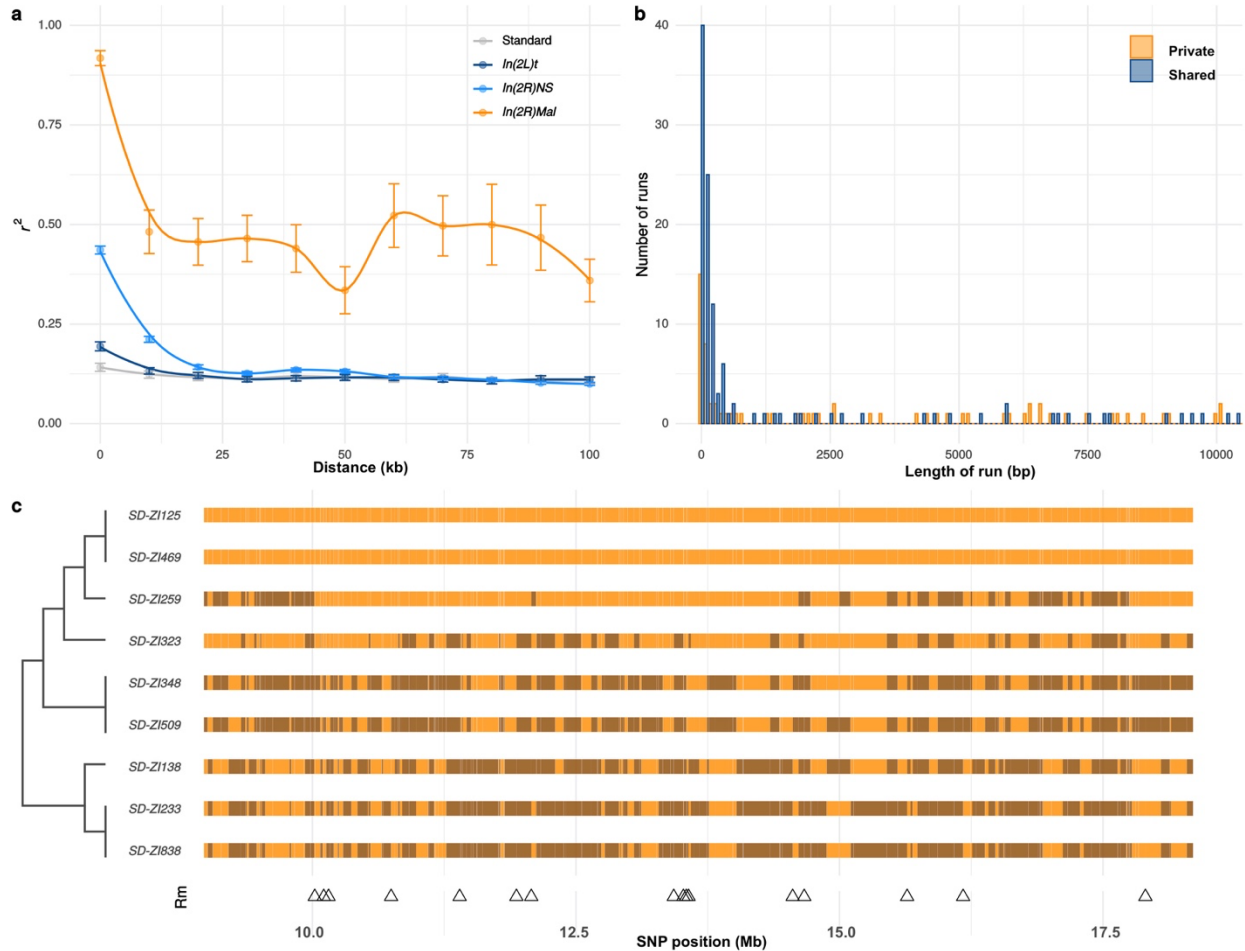

367

368 **Figure 5.** Recombination on *SD-Mal* haplotypes. (a) Linkage disequilibrium ( $r^2$ ) as a function of distance  
369 in 10-kb windows, measured in *In(2R)Mal*, *In(2L)t*, *In(2R)NS*, and the corresponding region of *In(2R)Mal*  
370 in a standard, uninverted 2R chromosome. (b) Histogram of length of runs of SNPs in *In(2R)Mal* shows  
371 that a high proportion of shared SNPs concentrate in runs shorter than 1 kb. (c) Chromosomal configuration  
372 of the 338 non-singleton SNPs in nine different *SD-Mal* lines. Color coded for two states (same in light  
373 orange or different in dark orange) using *SD-Z1125* as reference. Locations of minimal number of  
374 recombination events are labeled as triangles at the bottom. Maximum likelihood tree is displayed on the  
375 left.

376

377 While crossing over is suppressed in *SD-Mal/SD<sup>+</sup>* heterozygotes, gene conversion or double crossover  
378 events may still occur, accounting for the shared SNPs between *SD-Mal* and *SD<sup>+</sup>* chromosomes within  
379 *In(2R)Mal*. As both events exchange tracts of sequence, we expect shared SNPs to occur in runs of sites at  
380 higher densities than private SNPs, which should be distributed randomly. Accordingly, in *In(2R)Mal*, SNP  
381 density is five times higher for runs of shared SNPs (0.63 SNPs/kb) than for runs of *SD*-private SNPs (0.12  
382 SNPs/kb), as expected if *SD<sup>+</sup>* chromosomes, which have higher SNP densities, were donors of conversion  
383 tract sequences. Additionally, 62.2% (89 out of 143) of the shared SNP runs are <1 kb (Figure 5b),  
384 consistent with current estimates of gene conversion tract lengths in *D. melanogaster* (COMERON *et al.*

2012). Surprisingly, these inferred gene conversion events are unevenly distributed across *In(2R)Mal*, being more frequent in the *In(2R)Mal-p* than in *In(2R)Mal-d* (Suppl. Table S2). Our discovery that *SD-Mal* haplotypes can recombine with each other distinguishes the *SD-Mal* supergene from other completely genetically isolated supergenes (WANG *et al.* 2013; CHARLESWORTH 2016; TUTTLE *et al.* 2016). The lack of crossing over with *SD*<sup>+</sup> chromosomes, however, means that *SD-Mal* haplotypes evolve as a semi-isolated subpopulation, with a nearly 100-fold smaller  $N_e$  and limited gene flow from *SD*<sup>+</sup> via gene conversion events. The reduced recombination, low  $N_e$ , and history of epistatic selection may nevertheless lead to a higher genetic load on *SD-Mal* than *SD*<sup>+</sup> chromosomes. We therefore examined the accumulation of deleterious mutations, including non-synonymous mutations and transposable elements, on the *SD-Mal* supergene.

395

### 396 *Consequences of reduced recombination, small effective size, and epistatic selection*

397 We first studied the effects of a reduced efficacy of selection on SNPs in *In(2R)Mal*. As many or most non-synonymous polymorphisms are slightly deleterious (OHTA 1976; FAY *et al.* 2001; EYRE-WALKER *et al.* 2002), relatively elevated ratios of non-synonymous to synonymous polymorphisms (*N/S* ratio) can indicate a reduced efficacy of negative selection. For the SNPs in *In(2R)Mal*, the overall *N/S* ratio is 2.3-fold higher than that for the same region of *SD*<sup>+</sup> chromosomes (Table 3). Notably, the *N/S* ratio for private SNPs is 3.1-fold higher (Table 3), whereas the *N/S* ratios for shared SNPs do not significantly differ from *SD*<sup>+</sup> chromosomes (Table 3, Suppl. Fig. S5). These findings suggest that gene conversion from *SD*<sup>+</sup> ameliorates the accumulation of potentially deleterious non-synonymous mutations on *SD-Mal* chromosomes.

405

**Table 3.** Synonymous and non-synonymous SNPs

|              | <b>Genotype</b>        | <b><i>N</i></b> | <b><i>S</i></b> | <b><i>N/S</i></b> | <b>Fold change</b> | <b><i>p</i>-value</b> |
|--------------|------------------------|-----------------|-----------------|-------------------|--------------------|-----------------------|
| All SNPs     | <i>SD-Mal</i>          | 79              | 114             | 0.69              | 2.27               | <0.0001               |
|              | <i>SD</i> <sup>+</sup> | 10,470          | 34,301          | 0.31              |                    |                       |
| Private SNPs | <i>SD-Mal</i>          | 61              | 55              | 1.11              | 3.10               | <0.0001               |
|              | <i>SD</i> <sup>+</sup> | 6,782           | 18,938          | 0.36              |                    |                       |
| Shared SNPs  | <i>SD-Mal</i>          | 18              | 59              | 0.31              | 1.27               | 0.3722                |
|              | <i>SD</i> <sup>+</sup> | 3,688           | 15,363          | 0.24              |                    |                       |

Counts of non-synonymous (*N*) and synonymous (*S*) SNPs in the *In(2R)Mal* region of *SD-Mal* chromosomes, and the equivalent region of uninverted, *SD*<sup>+</sup> chromosomes. *N/S* ratio per genotype, fold-change of *N/S* ratios between *SD-Mal* and *SD*<sup>+</sup>. *P*-values reported by Pearson's  $\chi^2$  test of independence.

406

407

408

409 Gene conversion may not, however, rescue *SD-Mal* from deleterious transposable elements (TE) insertions,  
410 as average TE length exceeds the average gene conversion tract length (KAMINKER *et al.* 2002). TEs  
411 accumulate in regions of reduced recombination, such as centromeres (CHARLESWORTH *et al.* 1994) and  
412 inversions, especially those at low frequency (EANES *et al.* 1992; SNEGOWSKI AND CHARLESWORTH  
413 1994). Indeed, TE densities for the whole euchromatic region of chromosome *2R* are significantly higher  
414 for *SD-Mal* compared to *SD*<sup>+</sup> chromosomes (Figure 6a). This increased TE density on *SD-Mal* is driven by  
415 the non-recombining regions of the haplotype: *In(2R)Mal* has significantly higher TE density than *SD*<sup>+</sup>  
416 whereas the distal region of *2R* outside of the sweep region, does not (Figure 6b). The most overrepresented  
417 families in *In(2R)Mal* relative to standard chromosomes are *M4DM*, *MDG1*, *ROO\_I*, and *LINE* elements  
418 (Suppl. Fig.S6)— TEs that are currently or recently active (KAMINKER *et al.* 2002; KOFLER *et al.* 2015;  
419 DÍAZ-GONZÁLEZ AND DOMÍNGUEZ 2020)— consistent with the recent origin of the *SD-Mal* haplotype.  
420 Thus, the differences in shared *versus* private SNPs suggests that gene conversion from *SD*<sup>+</sup> chromosomes  
421 may provide a mechanism to purge deleterious point mutations but not TEs. Despite occasional  
422 recombination, the small  $N_e$  of *SD-Mal* haplotypes has incurred a higher genetic load.

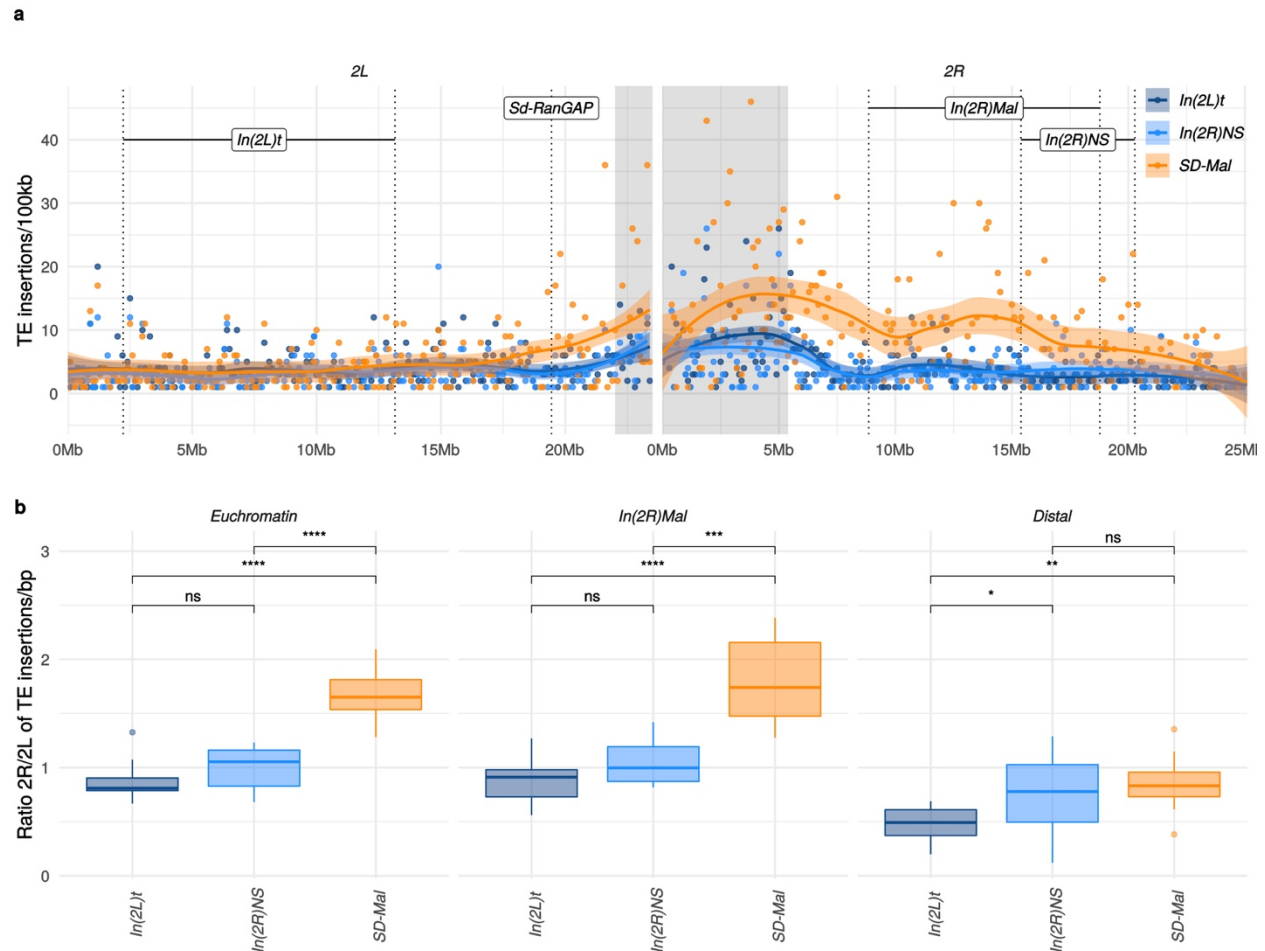

423

424 **Figure 6.** Transposable elements on *SD-Mal* haplotypes. (a) Number of *TE* insertions per 100-kb windows  
 425 along chromosome 2, in Zambian *SD* chromosomes (n=9, orange) and wildtype chromosomes from the  
 426 same population, bearing the cosmopolitan inversions *In(2L)t* (n=10, dark blue) and *In(2R)NS* (n=10, light  
 427 blue). (b) Ratio of the number of insertions in the euchromatin of *2R* to *2L* per library. The relative  
 428 enrichment in *TEs* in *2R* of *SD-Mal* haplotypes is mostly due to an increase of *TE* insertions in non-  
 429 recombining regions of the chromosome.

430

431

## 432 Conclusions

433 Supergenes are balanced, multigenic polymorphisms in which epistatic selection among component loci  
 434 favors the recruitment of recombination modifiers that reinforce the linkage of beneficial allelic  
 435 combinations. The advantages of reduced recombination among strongly selected loci can however  
 436 compromise the efficacy of selection at linked sites. Supergenes thus provide opportunities to study the  
 437 interaction of recombination and natural selection. We have studied a population of *selfish* supergenes, the  
 438 *SD-Mal* haplotypes of Zambia, to investigate the interplay of recombination, selection, and meiotic drive.  
 439 Our findings demonstrate, first, that the *SD-Mal* supergene extends across ~25.8 Mb of *D. melanogaster*



440 chromosome 2, a region that comprises the driving *Sd-RanGAP*, a drive-insensitive deletion at the major  
441 *Rsp* locus, and the *In(2R)Mal* double inversion. Second, using genetic manipulation, we show that *SD-Mal*  
442 requires *Sd-RanGAP* and an essential co-driver that localizes almost certainly within the *In(2R)Mal*  
443 rearrangement, and probably within the distal inversion. These data provide experimental evidence for  
444 epistasis between *Sd-RanGAP* and *In(2R)Mal*: neither allele can drive without the other. Third, we provide  
445 population genomics evidence that epistatic selection on loci spanning the *SD-Mal* supergene region drove  
446 a very recent, chromosome-scale selective sweep. These patterns are consistent with recurrent episodes of  
447 replacement of one *SD* haplotype by others (PRESGRAVES *et al.* 2009; BRAND *et al.* 2015). Fourth, despite  
448 rare crossovers among complementing *SD-Mal* haplotypes and gene conversion from wildtype  
449 chromosomes, the relative genetic isolation and low frequency of *SD-Mal* results in the accumulation of  
450 deleterious mutations including, especially, TE insertions. From these findings, we conclude that the *SD-*  
451 *Mal* supergene population is of small effective size, semi-isolated by from the greater population of  
452 wildtype chromosomes, and subject to bouts of very strong selection.

453 Non-recombining supergenes that exist exclusively in heterozygous state tend to degenerate, as in the case  
454 of Y chromosomes (reviewed in CHARLESWORTH AND CHARLESWORTH 2000) and some autosomal  
455 supergenes which, for different reasons, lack any opportunity for recombination (UYENOYAMA 2005;  
456 WANG *et al.* 2013; TUTTLE *et al.* 2016; BRANCO *et al.* 2018; STOLLE *et al.* 2019 ; BRELSFORD *et al.* 2020).  
457 But not all supergenes are necessarily expected to degenerate. In *SD-Mal*, for instance, complementing *SD-*  
458 *Mal* haplotypes can recombine via crossing over, if rarely, and gene flow from wildtype *SD*<sup>+</sup> to *SD-Mal*  
459 chromosomes can occur via gene conversion. In the mouse *t*-haplotype, there is similar evidence for  
460 occasional recombination between complementing *t*-haplotypes (DOD *et al.* 2003) and with standard  
461 chromosomes, probably via gene conversion (HERRMANN *et al.* 1987; ERHART *et al.* 2002; WALLACE AND  
462 ERHART 2008; KELEMEN AND VICOSO 2018). Despite the many parallels characterizing supergenes, their  
463 ultimate evolutionary fates depend on the particulars of the system.

464

465

466

## 467 **Material and methods**

468

### 469 *Fly lines, library construction and sequencing*

470 We sequenced haploid embryos using the scheme in Langely et al (LANGLEY *et al.* 2011), which takes  
471 advantage of a mutation, *ms(3)K81* (FUYAMA 1984), which causes the loss of the paternal genome early in

472 embryonic development. We crossed *SD-Mal/CyO* stocks generated in (BRAND *et al.* 2015) to homozygous  
473 *ms(3)K81* males and allowed them to lay eggs overnight. We inspected individual embryos under a  
474 dissecting scope for evidence of development and then isolated them for whole genome amplification using  
475 the REPLI-g Midi kit from Qiagen (catalog number 150043). For each WGA DNA sample, we tested for  
476 the presence of *Sd-RanGAP* using PCR (primers from (PRESGRAVES *et al.* 2009). We prepared sequencing  
477 libraries for Illumina sequencing with TruSeq PCR free 350bp. We assessed library quality using a  
478 BioAnalyzer and sequenced with HiSeq2500 2x150bp reads (TruSeq) or 2x125bp reads (Nextera). To trim  
479 reads, we used TrimGalore v0.3.7 and the parameters: `q 28 --length 20 --paired -a`  
480 `GATCGGAAGAGCACACGTCTGAACTCCAGTCAC` `-a2`  
481 `GATCGGAAGAGCGTCGTGTAGGGAAAGAGTGT --phred33 --fastqc --retain_unpaired -r1 21 -r2 21 --`  
482 `dont_gzip --length 20`. Trimmed reads are available in SRA (Bioproject PRJNA649752, SRA accession  
483 numbers in Table S1)

484

485 We sequenced a total of 10 *SD-Mal* genomes. One of these genomes (*SD-ZII57*) was *Sd-In(2R)Mal<sup>+</sup>*, non-  
486 driving, and therefore excluded from further analysis. Out of the remaining 9 driving *SD-Mal* chromosomes,  
487 one of them (*SD-ZII38*) had lower depth than the other 8 (Table S1, sheet 2) in the main chromosome arms  
488 but unusually high depth in the mitochondrial genome. We ran additional analyses dropping *SD-ZII38* and  
489 show that including this sample does not affect our main conclusions (Supp. Table S5; sheet 2).

490

491 For the Nanopore library, we extracted High-Molecular-Weight DNA from ~200 frozen female *SD-*  
492 *ZII25/SD-ZII25* virgins. We extracted DNA using a standard phenol-chloroform method and spooled DNA  
493 using capillary tubes. We constructed a library with ~1 ug DNA using RAD004 kit and the ultra-long read  
494 sequencing protocol (QUICK). We sequenced the library using R9.4 flow cells and called bases with the  
495 ONT Albacore Sequencing Pipeline Software version v2.2.10.

496

#### 497 *Estimating Rsp copy number*

498 We mapped Zambian *SD* reads to an assembly containing *2R* pericentric heterochromatin (CHANG AND  
499 LARRACUENTE 2019), including the *Rsp* locus detailed in Khost *et al.* (KHOST *et al.* 2017) with bowtie2  
500 v2.3.5 (LANGMEAD AND SALZBERG 2012). We estimated mean per-window and per-*Rsp* repeat depth using  
501 mosdepth v0.2.9 (PEDERSEN AND QUINLAN 2018). Coordinates for *Rsp* repeats were based on annotations  
502 in Khost *et al.* (2017).

503

504 *In(2R)Mal* breakpoints

505 To assemble *SD-ZII25*, we filtered Nanopore reads using Porechop (v0.2.3) and Filtrlong (--min\_length  
506 500) to remove adapters and short reads (<https://github.com/rrwick/Porechop>; (WICK *et al.* 2017) and  
507 <https://github.com/rrwick/Filtrlong>). We were left with a total of 1,766,164,534 bases in 327,248 filtered  
508 reads. We performed *de novo* assemblies with the Nanopore reads using Flye v2.3.7 (KOLMOGOROV *et al.*  
509 2019) with parameters “-t 24 -g 160m --nano-raw” and wtdbg v2.2 (RUAN AND LI 2020) with parameters -  
510 p 19 -AS 1 -s 0.05 -L 0 -e 1”. We independently polished these two assemblies 10 times with Pilon v1.22  
511 (WALKER *et al.* 2014) using paired-end Illumina reads. Lastly, we reconciled these two polished assemblies  
512 using quickmerge v0.3 (CHAKRABORTY *et al.* 2016) using the flye assembly as the reference with the  
513 command “python merge\_wrapper.py wtdbg assembly flye assembly”. We aligned the contig containing  
514 the euchromatin on *SD-ZII25* to chromosome 2R of the *D. melanogaster* (BDGP6) genome using Mauve  
515 (DARLING *et al.* 2010). We defined the breakpoints according to the block rearrangement shown in Figure  
516 1. To validate these breakpoints, we designed primers anchored at both sides of the most external  
517 breakpoints of *In(2R)Mal* (Suppl.Table S3) for PCR.

518

519 *Measuring genetic distances along SD-Mal and strength of distortion in the recombinants*

520 To estimate recombination frequencies and obtain *SD* recombinant genotypes, we used a stock (*al[1]*  
521 *dpy[ov1] b[1] pr[1] c[1] px[1] speck[1]*, BDSC156, Bloomington Drosophila Stock Center), which has  
522 three visible, recessive markers on chromosome 2: *black* (*b*, 2L: 13.82), *curved* (*c*, 2R:15.9) and *plexus* (*px*,  
523 2R:22.49). All crosses were transferred to a fresh vial after 5 days, and then adults were removed from the  
524 second vial after 5 days. Progeny emerging from the crosses were scored for up to 20 days following the  
525 cross.

526 To generate *SD-Mal* recombinant chromosomes, we crossed 8-10 *b,c,px/b,c,px* virgin females to 3-5 *SD-*  
527 *ZII25* males, recovered *SD-ZII25/b,c,px* virgins, then backcrossed 8-10 of them to 3-5 *b,c,px* homozygous  
528 males. To estimate genetic distance between the visible markers, we scored the number of recombinants in  
529 11 crosses (n=1820). To compare genetic distance in *SD-Mal* to wild-type chromosomes, we estimated the  
530 number of recombinants from 15 crosses between *OregonR/b,c,px* females to *b,c,px/b,c,px* males (n=1716).

531 We recovered three types of recombinant chromosomes from *SD-ZII25/b,c,px* x *b,c,px/b,c,px* crosses:  
532 *b,Sd<sup>+</sup>,c<sup>+</sup>,In(2R)Mal,px<sup>+</sup>* ; *b<sup>+</sup>,Sd,c,In(2R)Mal<sup>+</sup>,px* and *b<sup>+</sup>,Sd,c<sup>+</sup>,In(2R)Mal,px*. We crossed 3-5 virgin  
533 *b,c,px/b,c,px* females to individual recombinant males of each type, and scored the proportion of progeny  
534 carrying the recombinant chromosome ( $k = n_{\text{recombinant}}/n_{\text{total}}$ ). To distinguish distortion from viability effects,  
535 we also measured transmission of recombinant chromosomes through females, as drive is male-specific.

536 We used these crosses to measure relative viability ( $w = n_{\text{recombinant}}/n_{\text{bcpx}}$ ). We then used  $w$  to calculate a  
537 viability-corrected strength of distortion in males ( $k^* = n_{\text{recombinant}}/(wn_{\text{bcpx}} + n_{\text{recombinant}})$ ) (POWERS AND  
538 GANETZKY 1991).

539

#### 540 *Estimate of the frequency of SD-Mal in the DPGP3 dataset*

541 To estimate the frequency of *In(2R)Mal* in a random sample of Zambian chromosomes, we mapped the 204  
542 Illumina paired-end libraries from the DPGP3 dataset (LACK *et al.* 2016) to the *D. melanogaster* (BDGP6)  
543 genome, using bwa-mem (v0.7.9a), and we visually looked for an accumulation of discordant read pairs  
544 surrounding the estimated breakpoints of *In(2R)Mal*. To test the reliability of this method, we also applied  
545 it to detect cosmopolitan inversions *In(2L)t* and *In(2R)NS* and compared our inversion calls with the most  
546 recent inversion calls for the DPGP3 dataset ([http://johnpool.net/Updated\\_Inversions.xls](http://johnpool.net/Updated_Inversions.xls), last accessed  
547 07/13/2020), getting a 98% and 99% of concordance for *In(2L)t* and *In(2R)NS*, respectively. To determine  
548 the frequency of the *Sd-RanGAP* duplication in the DPGP3 dataset we applied a similar method around the  
549 breakpoints of the *Sd-RanGAP* duplication (see Suppl. Table S4).

550

#### 551 *SNP calling and annotation*

552 For SNP calling, we mapped the Illumina reads from our *SD-Mal* libraries and the 20 *SD*<sup>+</sup> libraries from  
553 the DPGP3 dataset to *D. melanogaster* (BDGP6) genome ([ftp://ftp.ensembl.org/pub/release-](ftp://ftp.ensembl.org/pub/release-88/fasta/drosophila_melanogaster/dna/)  
554 [88/fasta/drosophila\\_melanogaster/dna/](ftp://ftp.ensembl.org/pub/release-88/fasta/drosophila_melanogaster/dna/); last accessed 6/25/20) using BWA mem (v0.7.9a). We removed  
555 duplicated reads with Picard (2.0.1) and applied the GATK (3.5) “best practices” pipeline for SNP calling.  
556 We did local realignment and base score recalibration using SNPs data from DPGP1 ensembl release 88  
557 ([ftp://ftp.ensembl.org/pub/release-88/variation/vcf/drosophila\\_melanogaster/](ftp://ftp.ensembl.org/pub/release-88/variation/vcf/drosophila_melanogaster/); last accessed 6/25/20). To  
558 call SNPs and indels, we used HaplotypeCaller and performed joint genotyping for each of the five  
559 genotypes using GenotypeGVCFs. SNPs filtered with following parameters: 'QD < 2.0 || FS > 60.0 || MQ  
560 < 40.0 || MQRankSum < -12.5 || ReadPosRankSum < -8.0'. We annotated SNPs as synonymous or  
561 nonsynonymous using SNPeff (4.3, CINGOLANI *et al.* 2012) with the integrated *D. melanogaster* database  
562 (dmel\_r6.12) database and parsed these annotations with SNPsift (CINGOLANI *et al.* 2012). To classify the  
563 SNPs as ‘shared’ between *SD-Mal*, *SD*<sup>+</sup>*In(2L)t* and *SD*<sup>+</sup>*In(2R)NS*, or ‘private’ to each one of them, we used  
564 BCFtools intersect (1.6; DANECEK *et al.* 2021).

565

#### 566 *Population genomics analysis*

567 We wrote a Perl script to estimate  $S$ ,  $\pi$ , Tajima's  $D$ ,  $F_{ST}$  and  $d_{XY}$  in windows across the genome (available  
568 here: [https://github.com/bnavarrodominguez/sd\\_popgen](https://github.com/bnavarrodominguez/sd_popgen)). To calculate  $F_{ST}$  values, we used the Weir-  
569 Cockerham estimator (WEIR AND COCKERHAM 1984). Only those sites with a minimum sample depth of 8  
570 were included in the  $F_{ST}$  and Tajima's  $D$  calculations. We determined window size by the number of  
571 'acceptable sample depth' sites (and not, for example, a particular range of chromosome coordinates). To  
572 confirm that repeats were not interfering with our results, we ran our population genomics pipeline masking  
573 SNPs in repetitive elements identified by RepeatMasker (SMIT *et al.* 2013), which yielded equivalent results  
574 (Suppl. Table S5, sheet 1).

575

### 576 *Age of the sweep*

577 We calculated overall  $S_{In(2R)Mal}$ ,  $\pi_{In(2R)Mal}$  and Tajima's  $D_{In(2R)Mal}$  from the *SD-Mal* SNP set using our same  
578 Perl script (available here: [https://github.com/bnavarrodominguez/sd\\_popgen](https://github.com/bnavarrodominguez/sd_popgen)), using a single window of  
579 9.5Mb within the boundaries of *In(2R)Mal*. To account for gene conversion, we calculated an additional  
580 set of summary statistics masking the SNPs annotated as shared by at least one of the  $SD^+$  libraries. We  
581 estimated the time since the most recent selective sweep using an ABC method with rejection sampling.  
582 We modeled the selective sweep as an absolute bottleneck ( $N_r=1$ ) at some time ( $t$ ,  $4N_e$  generations) in the  
583 past. We performed simulations in *ms* (HUDSON 2002), considering a sample size of 9 and assuming no  
584 recombination in the ~9.92 Mb of *In(2R)Mal*. We simulated with values of  $S_{Sim}$  drawn from a uniform  
585 distribution  $\pm 5\%$  of  $S_{In(2R)Mal}$ . We considered a prior uniform distribution of time of the sweep ( $t$ ) ranging  
586 from 0 to  $4N_e$  generations, *i.e.*, 0 – 185,836 years ago, considering *D. melanogaster*  $N_e$  in Zambia 3,160,475  
587 (KAPOPOULOU *et al.* 2018), frequency of *In(2R)Mal* 1.47% and 10 generations per year. The rejection  
588 sampling algorithm is as follows: (1) draw  $S_{Sim}$  and  $t$  from prior distributions; (2) simulate 1000 samples  
589 using the coalescent under a selective sweep model; (3) calculate average summary statistics for drawn  $S_{Sim}$   
590 and  $t$ ; (4) accept or reject chosen parameter values conditional on  $|\pi_{In(2R)Mal} - \pi_{Sim}| \leq \epsilon$ ,  $|D_{In(2R)Mal} - D_{Sim}| \leq \epsilon$ ;  
591 (5) return to step 1 and continue simulations until  $m$  desired samples from the joint posterior probability  
592 distribution are collected. For estimates of  $t$ ,  $\epsilon$  was set to 5% of the observed values of the summary statistics  
593 (in step 4) and  $m$  was set to 10,000. These simulations were performed with parameters calculated using all  
594 the SNPs in *In(2R)Mal* and excluding SNPs shared with  $SD^+$  chromosomes to account for gene conversion.  
595 We simulated 100,000 samples with the resulting estimated  $t$  and  $S_{In(2R)Mal}$ , under our sweep model and  
596 under a constant size population model, and calculated two-sided  $p$  values for  $\pi$  and Tajima's  $D$  using an  
597 empirical cumulative probability function (ecdf) in R (TEAM 2019). We estimated the maximum *a*  
598 *posteriori* estimate (MAP) as the posterior mode and 95% credibility intervals (CI) in R (TEAM 2019).

599

## 600 *Recombination*

601 For estimates of recombination, we filtered the SNPs in *In(2R)Mal* to variable positions genotyped in all of  
602 the 9 *ZI-SD* samples and excluded singletons, resulting in a total of 338 SNPs. We estimated pairwise  
603 linkage disequilibrium ( $r^2$ ) using PLINK v1.9 (PURCELL *et al.* 2007). We discarded  $r^2$  data calculated for  
604 pairs of SNPs flanking the internal *In(2R)Mal* breakpoints. For comparison, we estimated pairwise linkage  
605 disequilibrium in the same region of *In(2R)Mal* for  $SD^+$  uninverted *2R* chromosome arms and, for  
606 comparison, in  $SD^+$  *In(2R)NS* inversion and in  $SD^+$  *In(2L)t* inversions. For  $SD^+$  chromosomes we applied  
607 the same filters (variable, non-singleton SNPs), plus a SNP ‘thinning’ to 1 SNPs/kb to get a manageable  
608 set of results. To investigate the possibility of crossing over between *SD-Mal* chromosomes, we used  
609 RecMin (MYERS AND GRIFFITHS 2003) to estimate the minimum number of crossovers between the 338  
610 bi-allelic, non-singleton SNPs in *In(2R)Mal*. RecMin input is a binary file, which we generated using *SD-*  
611 *ZII25* as an arbitrary reference for *SD*, assigning 0 or 1 on each position depending on if it was the same  
612 base or different. Maximum likelihood trees to establish relationships between *SD-Mal* haplotypes based  
613 on these 338 SNPs were estimated using RAXML-NG (KOZLOV *et al.* 2019).

614 Runs of shared and private SNPs were identified in R, using all SNPs (including singletons). A run of SNPs  
615 is defined as a region from 5’ to 3’ where all the SNPs are in the same category (shared or private). Distance  
616 between the first and the last SNP of a category is considered length of the run. The region between the last  
617 SNP of a category and the first SNP of the alternative category is considered distance between runs. Because  
618 our sample size is small, we may underestimate the number of shared SNPs, as some private SNPs may be  
619 shared with some  $SD^+$  chromosomes that we have not sampled.

620

## 621 *Transposable element calling*

622 We used a transposable element (TE) library containing consensus sequences of *Drosophila* TE families  
623 (CHANG AND LARRACUENTE 2019). With this library, we ran RepeatMasker (SMIT *et al.* 2013) to annotate  
624 reference TEs in the *D. melanogaster* (BDGP6) genome. To detect genotype specific TE insertions in our  
625 Illumina libraries, we used the McClintock pipeline (NELSON *et al.* 2017), which runs six different programs  
626 with different strategies for TE calling. We collected the redundant outputs from RetroSeq (KEANE *et al.*  
627 2013), PoPoolationTE (KOFLENER *et al.* 2012), ngs\_te\_mapper (LINHEIRO AND BERGMAN 2012), TE-locate  
628 (PLATZER *et al.* 2012) and TEMP (ZHUANG *et al.* 2014), discarded the calls produced by TEMP based on  
629 non-evidence of absence, and then merged the insertions detected by all different programs, considering  
630 the same insertion those of the same TE closer than a distance of +/- 600 bp, as described in (BAST *et al.*



631 2019). To reduce false positives, we only considered TE insertion calls that were predicted by more than  
632 one of the methods. To account for differences in library read number and/or length between datasets, we  
633 report the TE counts for *2R* normalized by the TE count for chromosome *2L* for the same library (Figure  
634 6b). To assess whether library differences qualitatively affect our results, we repeated the above TE analysis  
635 on a set of 3 million randomly selected paired-end reads, trimmed to a fixed length of 75 bp, from each  
636 library and report TE count for chromosomes *2R* and *2L* separately (Suppl. Fig. S7).

637

### 638 **Acknowledgements**

639 This work was funded by the National Institutes of Health (NIH) National Institute of General  
640 Medical Sciences (R35GM119515 and NIH-NRSA F32GM105317 to A.M.L.), Stephen Biggar  
641 and Elisabeth Asaro fellowship in Data Science to A.M.L, a David and Lucile Packard Foundation  
642 grant and University of Rochester funds to D.C.P. We thank Dr. Danna Eickbush for assistance  
643 with genomic DNA preparation for nanopore sequencing. We also thank the University of  
644 Rochester CIRC for access to computing cluster resources and UR Genomics Research Center for  
645 the library construction and sequencing.

646

### 647 **Data availability**

648 Raw sequence data are deposited in NCBI's short read archive under project accession PRJNA649752. All  
649 code for data analysis and figure generation is available in Github  
650 ([https://github.com/bnavarrodominguez/sd\\_popgen](https://github.com/bnavarrodominguez/sd_popgen)).

651

### 652 **Figure Legends**

653 Figure 1. Map depicting the chromosomal features of the *SD-Mal* chromosome. The schematic shows the  
654 cytogenetic map of chromosomes *2L* and *2R* (redrawn based on images in LEFEVRE 1976) and the major  
655 features of the chromosome. (a) Dotplot showing that the *Sd* locus is a partial duplication of the gene  
656 *RanGAP* (in black), located at band *37D2-6*. (b) The *Rsp-major* locus is an array of tandem repeats located  
657 in the pericentric heterochromatin (band *h39*). Read mapping shows that *SD-Mal* chromosomes do not have  
658 any *Rsp* repeats in the *Rsp-major* locus, consistent with being insensitive to distortion by *Sd* (*Rsp<sup>i</sup>*) (orange,  
659 high relative coverage regions correspond to transposable element interspersed), in contrast with *Iso-1*,  
660 which is sensitive (*Rsp<sup>s</sup>*). (c) Two paracentric, overlapping inversions constitute the *In(2R)Mal*

661 arrangement: *In(2R)51BC;55E (In(2R)Mal-p)* in orange brackets and *In(2R)44F;54E (In(2R)Mal-d)* in red  
662 parentheses). Pericentromeric heterochromatin and the centromere are represented by a grey rectangle and  
663 black circle, respectively. Our assembly based on long-read sequencing data provide the exact breakpoints  
664 of *In(2R)Mal* and confirms that the distal inversion (*Dmel.r6*, 2R:14,591,034-18,774,475) occurred first,  
665 and the proximal inversion (*Dmel.r6*, 2R:8,855,601-15,616,195) followed, overlapping ~1Mb with the  
666 distal inversion. The colored rectangles correspond to locally collinear blocks of sequence. Blocks below  
667 the center black line indicate regions that align in the reverse complement orientation. Vertical red lines  
668 indicate the end of the assembled chromosomes. Visible marker locations used for generating recombinants  
669 (*b* (34D1), *c* (52D1), and *px* (58E4-58E8)) are indicated on the cytogenetic map.

670

671 Figure 2. Diversity on *SD-Mal* chromosomes. (a) Average pairwise nucleotide diversity per site ( $\pi$ ) and (b)  
672 Tajima's *D* estimates in non-overlapping 10-kb windows along chromosome 2, in Zambian *SD-Mal*  
673 chromosomes (n=9, orange) and *SD*<sup>+</sup> chromosomes from the same population, bearing the cosmopolitan  
674 inversions *In(2L)t* (n=10, dark blue) and *In(2R)NS* (n=10, light blue). Regions corresponding to pericentric  
675 heterochromatin are shaded in grey and the centromere location is marked with a black circle. *SD-Mal*  
676 chromosomes show a sharp decrease in nucleotide diversity and skewed frequency spectrum from the *Sd*  
677 locus (*Sd-RanGAP*, 2L:19.4Mb) to ~2.9 Mb beyond the distal breakpoint of *In(2R)Mal*.

678

679 Figure 3. Differentiation between *SD-Mal* and wildtype chromosomes. (a) Pairwise  $F_{ST}$  and (b)  $d_{XY}$  per base  
680 pair in non-overlapping 10-kb windows along chromosome 2, between Zambian *SD-Mal* haplotypes (n=9)  
681 and wildtype chromosomes from the same population, bearing the cosmopolitan inversions *In(2L)t* (n=10)  
682 and *In(2R)NS* (n=10). Regions corresponding to pericentric heterochromatin are shaded in grey and the  
683 centromere location is marked with a black circle.

684

685 Figure 4. Estimating the time since the *SD-Mal* selective sweep. ABC estimates based on 10,000 posterior  
686 samples place the onset of the selective sweep between 0.096 (95% C.I. 0.092 - 0.115) and 0.0737 (0.070 -  
687 0.092) x 4  $N_e$  generations, i.e. ~1,368-1,792 years ago, considering recent estimates of  $N_e$  in Zambia from  
688 (KAPOPOULOU *et al.* 2018), frequency of *SD-Mal* in Zambia 1.47% and 10 generations per year). Estimates  
689 were done considering only *In(2R)Mal*, where crossing over is rare and only occurs between *SD-Mal*  
690 chromosomes using all SNPs and excluding shared SNPs in order to account for gene conversion from *SD*<sup>+</sup>  
691 chromosomes.

692

693 Figure 5. Recombination on *SD-Mal* haplotypes. (a) Linkage disequilibrium ( $r^2$ ) as a function of distance  
694 in 10-kb windows, measured in *In(2R)Mal*, *In(2L)t*, *In(2R)NS*, and the corresponding region of *In(2R)Mal*  
695 in a standard, uninverted *2R* chromosome. (b) Histogram of length of runs of SNPs in *In(2R)Mal* shows  
696 that a high proportion of shared SNPs concentrate in runs shorter than 1 kb. (c) Chromosomal configuration  
697 of the 338 non-singleton SNPs in nine different *SD-Mal* lines. Color coded for two states (same in light  
698 orange or different in dark orange) using *SD-ZII25* as reference. Locations of minimal number of  
699 recombination events are labeled as triangles at the bottom. Maximum likelihood tree is displayed on the  
700 left.

701

702 Figure 6. Transposable elements on *SD-Mal* haplotypes. (a) Number of *TE* insertions per 100-kb windows  
703 along chromosome 2, in Zambian *SD* chromosomes (n=9, orange) and wildtype chromosomes from the  
704 same population, bearing the cosmopolitan inversions *In(2L)t* (n=10, dark blue) and *In(2R)NS* (n=10, light  
705 blue). (b) Ratio of the number of insertions in the euchromatin of *2R* to *2L* per library. The relative  
706 enrichment in *TEs* in *2R* of *SD-Mal* haplotypes is mostly due to an increase of *TE* insertions in non-  
707 recombining regions of the chromosome.

708

### 709 **Supplemental figure legends**

710 Suppl. Fig. S1. Estimated abundance of *Rsp* repeats at each *Rsp* locus in the reference *Iso-1* genome and  
711 *SD-Mal*. For each locus annotated in the reference *D. melanogaster* genome (KHOST *et al.* 2017), we plot  
712 estimated *Rsp* abundance as the sum of average depth of repeats at each locus normalized by average depth  
713 of chromosome 2 on the y-axis. *SD-Mal* has very few reads mapping to the primary *Rsp* locus (*Rsp-proximal*  
714 and *Rsp-major*), suggesting a complete deletion of the target of drive.

715

716 Suppl. Fig. S2. Model of the *In(2R)Mal* rearrangement. (a) Wild-type arrangement of chromosome *2R*.  
717 Pericentromeric heterochromatin and the centromere are represented by a grey rectangle and black circle,  
718 respectively. (b) *In(2R)Mal-d*: inversion of 4.18 Mb of *2R* (*2R*:14,591,003-18,774,475), which disrupted  
719 the 3' UTR of the *Mctp* gene (*2R*:18,761,758 - 18,774,824). (c) *In(2R)Mal-p*: Inversion of 6.76 Mb of *2R*  
720 (*2R*:8,855,602- 17,749,310), with 1.02 Mb overlapping with the now proximal segment of *In(2R)Mal-d*.  
721 This inversion disrupted the 3' UTR of the *sns* gene (*2R*:8,798,489 - 8,856,091) and the CDS of the  
722 *CG10931* gene (*2R*:17,748,935 -17,750,136).

723

724 Suppl. Fig. S3. Average pairwise nucleotide diversity per site ( $\pi$ ) in non-overlapping, 1-kb windows, for  
725  $SD^+$  and  $SD$ -*Mal* chromosomes, around the *Sd-RanGAP* locus.

726

727 Suppl. Fig. S4. Neutral coalescent simulations under a constant size population model and a sweep and  
728 expansion model (absolute bottleneck at a time  $t$ , between 0 and  $4N_e$  generations). Simulations were done  
729 with  $S$  estimated using all SNPs in *In(2R)Mal* (a) and excluding SNPs shared with  $SD^+$  chromosomes (b)  
730 to account for gene conversion. Blue horizontal line marks observed  $\pi_{In2RMal}$  (estimated for the entire region)  
731 and Tajima's  $D$  in *In(2R)Mal* in Zambian  $SD$  chromosomes.

732

733 Suppl. Fig. S5. Frequency spectra of synonymous and non-synonymous SNPs in the *In(2R)Mal*  
734 chromosome region, in Zambian  $SD$  chromosomes ( $n=9$ , orange) and wildtype chromosomes from the same  
735 population, bearing the cosmopolitan inversions *In(2L)t* ( $n=10$ , dark blue) and *In(2R)NS* ( $n=10$ , light blue).  
736  $N/S$  ratio for each of the frequency categories.

737

738 Suppl. Fig. S6. Number of insertions per TE family in  $SD$ -*Mal* compared to uninverted  $SD^+$  chromosome  
739  $2R$ , both in *In(2R)Mal* ( $2R:8.85-18.77$ , top panel) and the region distal to it ( $2R:18.77-25.29$ , bottom panel).  
740 The families *DNA/M4DM*, *LTR/MDG1*, *LTR/ROO\_I* and *Non-LTR/LINE* are highly overrepresented in  
741 *In(2R)Mal*.

742

743 Suppl. Fig. S7 Abundance of TEs in down sampled (3M reads, 75-bp) libraries for Zambian  $SD$   
744 chromosomes ( $n=9$ , orange) and  $SD^+$  chromosomes from the same population, bearing the cosmopolitan  
745 inversions *In(2L)t* ( $N=10$ , dark blue) and *In(2R)NS* ( $N=10$ , light blue).

746

747

## 748 **References**

749 Aulard, S., J. R. David and F. Lemeunier, 2002 Chromosomal inversion polymorphism in Afrotropical  
750 populations of *Drosophila melanogaster*. *Genetics Research* 79: 49-63.  
751 Awadalla, P., A. Eyre-Walker and J. M. Smith, 1999 Linkage disequilibrium and recombination in hominid  
752 mitochondrial DNA. *Science* 286: 2524-2525.

- 753 Bast, J., K. S. Jaron, D. Schuseil, D. Roze and T. Schwander, 2019 Asexual reproduction reduces  
754 transposable element load in experimental yeast populations. *Elife* 8.
- 755 Branco, S., F. Carpentier, R. C. R. de la Vega, H. Badouin, A. Snirc *et al.*, 2018 Multiple convergent  
756 supergene evolution events in mating-type chromosomes. *Nature communications* 9: 1-13.
- 757 Brand, C. L., A. M. Larracuenta and D. C. Presgraves, 2015 Origin, evolution, and population genetics of  
758 the selfish *Segregation Distorter* gene duplication in European and African populations of  
759 *Drosophila melanogaster*. *Evolution* 69: 1271-1283.
- 760 Brelsford, A., J. Purcell, A. Avril, P. T. Van, J. Zhang *et al.*, 2020 An ancient and eroded social supergene  
761 is widespread across *Formica* ants. *Current Biology*.
- 762 Brittnacher, J. G., and B. Ganetzky, 1984 On the components of segregation distortion in *Drosophila*  
763 *melanogaster*. III. Nature of enhancer of *SD*. *Genetics* 107: 423-434.
- 764 Chakraborty, M., J. G. Baldwin-Brown, A. D. Long and J. J. Emerson, 2016 Contiguous and accurate de  
765 novo assembly of metazoan genomes with modest long read coverage. *Nucleic Acids Res* 44: e147.
- 766 Chang, C. H., and A. M. Larracuenta, 2019 Heterochromatin-Enriched Assemblies Reveal the Sequence  
767 and Organization of the *Drosophila melanogaster* Y Chromosome. *Genetics* 211: 333-348.
- 768 Charlesworth, B., and D. Charlesworth, 2000 The degeneration of Y chromosomes. *Philos Trans R Soc*  
769 *Lond B Biol Sci* 355: 1563-1572.
- 770 Charlesworth, B., and D. L. Hartl, 1978 Population Dynamics of the *Segregation Distorter* Polymorphism  
771 of *Drosophila melanogaster*. *Genetics* 89: 171-192.
- 772 Charlesworth, B., P. Sniegowski and W. Stephan, 1994 The evolutionary dynamics of repetitive DNA in  
773 eukaryotes. *Nature* 371: 215-220.
- 774 Charlesworth, D., 2016 The status of supergenes in the 21st century: recombination suppression in Batesian  
775 mimicry and sex chromosomes and other complex adaptations. *Evolutionary Applications* 9: 74-  
776 90.
- 777 Charlesworth, D., and B. Charlesworth, 1975 Theoretical genetics of Batesian mimicry II. Evolution of  
778 supergenes. *Journal of Theoretical Biology* 55: 305-324.
- 779 Chintapalli, V. R., J. Wang and J. A. Dow, 2007 Using FlyAtlas to identify better *Drosophila melanogaster*  
780 models of human disease. *Nat Genet* 39: 715-720.
- 781 Cingolani, P., A. Platts, L. Wang le, M. Coon, T. Nguyen *et al.*, 2012 A program for annotating and  
782 predicting the effects of single nucleotide polymorphisms, SnpEff: SNPs in the genome of  
783 *Drosophila melanogaster* strain w1118; iso-2; iso-3. *Fly (Austin)* 6: 80-92.
- 784 Comeron, J. M., R. Ratnappan and S. Bailin, 2012 The many landscapes of recombination in *Drosophila*  
785 *melanogaster*. *PLoS genetics* 8.
- 786 Conway, D. J., C. Roper, A. M. Oduola, D. E. Arnot, P. G. Kremsner *et al.*, 1999 High recombination rate  
787 in natural populations of *Plasmodium falciparum*. *Proceedings of the National Academy of*  
788 *Sciences* 96: 4506-4511.
- 789 Crown, K. N., D. E. Miller, J. Sekelsky and R. S. Hawley, 2018 Local inversion heterozygosity alters  
790 recombination throughout the genome. *Curr Biol* 28: 2984-2990 e2983.
- 791 Danecek, P., J. K. Bonfield, J. Liddle, J. Marshall, V. Ohan *et al.*, 2021 Twelve years of SAMtools and  
792 BCFtools. *Gigascience* 10.
- 793 Darling, A. E., B. Mau and N. T. Perna, 2010 progressiveMauve: Multiple genome alignment with gene  
794 gain, loss and rearrangement. *PLoS One* 5: e11147.
- 795 Díaz-González, J., and A. Domínguez, 2020 Different structural variants of roo retrotransposon are active  
796 in *Drosophila melanogaster*. *Gene* 741: 144546.
- 797 Dod, B., C. Litel, P. Makoundou, A. Orth and P. Boursot, 2003 Identification and characterization of t  
798 haplotypes in wild mice populations using molecular markers. *Genetics Research* 81: 103-114.
- 799 Eanes, W. F., C. Wesley and B. Charlesworth, 1992 Accumulation of P elements in minority inversions in  
800 natural populations of *Drosophila melanogaster*. *Genetics Research* 59: 1-9.
- 801 Erhart, M. A., S. Lekgothoane, J. Grenier and J. H. Nadeau, 2002 Pattern of segmental recombination in  
802 the distal inversion of mouse t haplotypes. *Mammalian genome* 13: 438.



- 803 Eyre-Walker, A., P. D. Keightley, N. G. Smith and D. Gaffney, 2002 Quantifying the slightly deleterious  
804 mutation model of molecular evolution. *Molecular Biology and Evolution* 19: 2142-2149.
- 805 Fay, J. C., G. J. Wyckoff and C.-I. Wu, 2001 Positive and negative selection on the human genome. *Genetics*  
806 158: 1227-1234.
- 807 Felsenstein, J., 1974 The evolutionary advantage of recombination. *Genetics* 78: 737-756.
- 808 Fiston-Lavier, A. S., N. D. Singh, M. Lipatov and D. A. Petrov, 2010 *Drosophila melanogaster*  
809 recombination rate calculator. *Gene* 463: 18-20.
- 810 Fuyama, Y., 1984 Gynogenesis in *Drosophila-Melanogaster*. *Japanese Journal of Genetics* 59: 91-96.
- 811 Ganetzky, B., 1977 On the components of segregation distortion in *Drosophila melanogaster*. *Genetics* 86:  
812 321-355.
- 813 Hamilton, W. D., 1967 Extraordinary sex ratios. A sex-ratio theory for sex linkage and inbreeding has new  
814 implications in cytogenetics and entomology. *Science* 156: 477-488.
- 815 Hartl, D. L., 1974 Genetic dissection of segregation distortion. I. Suicide combinations of *SD* genes.  
816 *Genetics* 76: 477-486.
- 817 Hartl, D. L., 1975 Genetic dissection of segregation distortion II. Mechanism of suppression of distortion  
818 by certain inversions. *Genetics* 80: 539-547.
- 819 Hartl, D. L., Y. Hiraizumi and J. F. Crow, 1967 Evidence for sperm dysfunction as mechanism of  
820 segregation distortion in *Drosophila melanogaster*. *Proceedings of the National Academy of*  
821 *Sciences of the United States of America* 58: 2240-+.
- 822 Herrmann, B. G., D. P. Barlow and H. Lehrach, 1987 A large inverted duplication allows homologous  
823 recombination between chromosomes heterozygous for the proximal t complex inversion. *Cell* 48:  
824 813-825.
- 825 Hill, W., and A. Robertson, 1968 Linkage disequilibrium in finite populations. *Theoretical and applied*  
826 *genetics* 38: 226-231.
- 827 Hiraizumi, Y., D. W. Martin and I. A. Eckstrand, 1980 A modified model of segregation distortion in  
828 *Drosophila melanogaster*. *Genetics* 95: 693-706.
- 829 Houtchens, K., and T. W. Lyttle, 2003 *Responder (Rsp)* alleles in the *Segregation Distorter (SD)* system of  
830 meiotic drive in *Drosophila* may represent a complex family of satellite repeat sequences. *Genetica*  
831 117: 291-302.
- 832 Hudson, R. R., 2002 Generating samples under a Wright–Fisher neutral model of genetic variation.  
833 *Bioinformatics* 18: 337-338.
- 834 Hudson, R. R., and N. L. Kaplan, 1985 Statistical properties of the number of recombination events in the  
835 history of a sample of DNA sequences. *Genetics* 111: 147-164.
- 836 Hurst, L. D., and A. Pomiankowski, 1991 Causes of sex ratio bias may account for unisexual sterility in  
837 hybrids: a new explanation of Haldane's rule and related phenomena. *Genetics* 128: 841-858.
- 838 Kaminker, J. S., C. M. Bergman, B. Kronmiller, J. Carlson, R. Svirskas *et al.*, 2002 The transposable  
839 elements of the *Drosophila melanogaster* euchromatin: a genomics perspective. *Genome biology*  
840 3: research0084. 0081.
- 841 Kapopoulou, A., S. P. Pfeifer, J. D. Jensen and S. Laurent, 2018 The demographic history of African  
842 *Drosophila melanogaster*. *Genome biology and evolution* 10: 2338-2342.
- 843 Keane, T. M., K. Wong and D. J. Adams, 2013 RetroSeq: transposable element discovery from next-  
844 generation sequencing data. *Bioinformatics* 29: 389-390.
- 845 Kelemen, R. K., and B. Vicoso, 2018 Complex history and differentiation patterns of the t-haplotype, a  
846 mouse meiotic driver. *Genetics* 208: 365-375.
- 847 Keller, L., and K. G. Ross, 1998 Selfish genes: a green beard in the red fire ant. *Nature* 394: 573-575.
- 848 Khost, D. E., D. G. Eickbush and A. M. Larracuent, 2017 Single-molecule sequencing resolves the detailed  
849 structure of complex satellite DNA loci in *Drosophila melanogaster*. *Genome research* 27: 709-  
850 721.
- 851 Kofler, R., A. J. Betancourt and C. Schlotterer, 2012 Sequencing of pooled DNA samples (Pool-Seq)  
852 uncovers complex dynamics of transposable element insertions in *Drosophila melanogaster*. *PLoS*  
853 *Genet* 8: e1002487.



- 854 Kofler, R., V. Nolte and C. Schlotterer, 2015 Tempo and Mode of Transposable Element Activity in  
855 *Drosophila*. PLoS Genet 11: e1005406.
- 856 Kolmogorov, M., J. Yuan, Y. Lin and P. A. Pevzner, 2019 Assembly of long, error-prone reads using repeat  
857 graphs. Nat Biotechnol 37: 540-546.
- 858 Kozlov, A. M., D. Darriba, T. Flouri, B. Morel and A. Stamatakis, 2019 RAxML-NG: a fast, scalable and  
859 user-friendly tool for maximum likelihood phylogenetic inference. Bioinformatics 35: 4453-4455.
- 860 Kusano, A., C. Staber and B. Ganetzky, 2001 Nuclear mislocalization of enzymatically active *RanGAP*  
861 causes segregation distortion in *Drosophila*. Dev Cell 1: 351-361.
- 862 Lack, J. B., J. D. Lange, A. D. Tang, R. B. Corbett-Detig and J. E. Pool, 2016 A Thousand Fly Genomes:  
863 An Expanded *Drosophila* Genome Nexus. Mol Biol Evol 33: 3308-3313.
- 864 Langley, C. H., M. Crepeau, C. Cardeno, R. Corbett-Detig and K. Stevens, 2011 Circumventing  
865 heterozygosity: sequencing the amplified genome of a single haploid *Drosophila melanogaster*  
866 embryo. Genetics 188: 239-246.
- 867 Langmead, B., and S. L. Salzberg, 2012 Fast gapped-read alignment with Bowtie 2. Nature methods 9:  
868 357-359.
- 869 Larkin, A., S. J. Marygold, G. Antonazzo, H. Attrill, G. Dos Santos *et al.*, 2021 FlyBase: updates to the  
870 *Drosophila melanogaster* knowledge base. Nucleic Acids Res 49: D899-D907.
- 871 Larracuente, A. M., 2014 The organization and evolution of the *Responder* satellite in species of the  
872 *Drosophila melanogaster* group: dynamic evolution of a target of meiotic drive. BMC evolutionary  
873 biology 14: 233-233.
- 874 Larracuente, A. M., and D. C. Presgraves, 2012 The selfish *Segregation Distorter* gene complex of  
875 *Drosophila melanogaster*. Genetics 192: 33-53.
- 876 Laurent, S. J., A. Werzner, L. Excoffier and W. Stephan, 2011 Approximate Bayesian analysis of  
877 *Drosophila melanogaster* polymorphism data reveals a recent colonization of Southeast Asia.  
878 Molecular biology and evolution 28: 2041-2051.
- 879 Lefevre, G., 1976 A photographic representation and interpretation of the polytene chromosomes of  
880 *Drosophila melanogaster* salivary glands. , pp. 31-66 in *The Genetics and Biology of Drosophila*,  
881 edited by Ashburner and Novitski.
- 882 Li, H. P., and W. Stephan, 2006 Inferring the demographic history and rate of adaptive substitution in  
883 *Drosophila*. Plos Genetics 2: 1580-1589.
- 884 Lindholm, A. K., K. A. Dyer, R. C. Firman, L. Fishman, W. Forstmeier *et al.*, 2016 The ecology and  
885 evolutionary dynamics of meiotic drive. Trends in Ecology & Evolution 31: 315-326.
- 886 Linheiro, R. S., and C. M. Bergman, 2012 Whole genome resequencing reveals natural target site  
887 preferences of transposable elements in *Drosophila melanogaster*. PloS one 7: e30008.
- 888 Lyon, M. F., 2003 Transmission ratio distortion in mice. Annual review of genetics 37: 393-408.
- 889 Lyttle, T. W., 1991 Segregation distorters. Annual review of genetics 25: 511-581.
- 890 Merrill, C., L. Bayraktaroglu and A. Kusano, *et al.* 1999 Truncated *RanGAP* encoded by the *Segregation*  
891 *Distorter* locus of *Drosophila*.
- 892 Miklos, G. L. G., 1972 The genetic structure of chromosomes carrying segregation-distorter. Canadian  
893 Journal of Genetics and Cytology 14: 235-243.
- 894 Miller, D. E., K. R. Cook, A. V. Arvanitakis and R. S. Hawley, 2016 Third Chromosome Balancer  
895 Inversions Disrupt Protein-Coding Genes and Influence Distal Recombination Events in  
896 *Drosophila melanogaster*. G3 (Bethesda) 6: 1959-1967.
- 897 Miller, D. E., K. R. Cook, E. A. Hemenway, V. Fang, A. L. Miller *et al.*, 2018 The Molecular and Genetic  
898 Characterization of Second Chromosome Balancers in *Drosophila melanogaster*. G3 (Bethesda) 8:  
899 1161-1171.
- 900 Miyashita, N., and C. H. Langley, 1988 Molecular and phenotypic variation of the *white* locus region in  
901 *Drosophila melanogaster*. Genetics 120: 199-212.
- 902 Muller, H. J., 1964 The relation of recombination to mutational advance. Mutation Research/Fundamental  
903 and Molecular Mechanisms of Mutagenesis 1: 2-9.

- 904 Myers, S. R., and R. C. Griffiths, 2003 Bounds on the minimum number of recombination events in a  
905 sample history. *Genetics* 163: 375-394.
- 906 Nelson, M. G., R. S. Linheiro and C. M. Bergman, 2017 McClintock: an integrated pipeline for detecting  
907 transposable element insertions in whole-genome shotgun sequencing data. *G3: Genes, Genomes,*  
908 *Genetics* 7: 2763-2778.
- 909 Ohta, T., 1976 Role of very slightly deleterious mutations in molecular evolution and polymorphism.  
910 *Theoretical population biology* 10: 254-275.
- 911 Pedersen, B. S., and A. R. Quinlan, 2018 Mosdepth: quick coverage calculation for genomes and exomes.  
912 *Bioinformatics* 34: 867-868.
- 913 Pimpinelli, S., and P. Dimitri, 1989 Cytogenetic analysis of segregation distortion in *Drosophila*  
914 *melanogaster*: the cytological organization of the *Responder* (*Rsp*) locus. *Genetics* 121: 765-772.
- 915 Platzer, A., V. Nizhynska and Q. Long, 2012 TE-Locate: a tool to locate and group transposable element  
916 occurrences using paired-end next-generation sequencing data. *Biology* 1: 395-410.
- 917 Pool, J. E., R. B. Corbett-Detig, R. P. Sugino, K. A. Stevens, C. M. Cardeno *et al.*, 2012 Population  
918 genomics of sub-Saharan *Drosophila melanogaster*: African diversity and non-African admixture.  
919 *PLoS Genet* 8: e1003080.
- 920 Powers, P. A., and B. Ganetzky, 1991 On the components of segregation distortion in *Drosophila*  
921 *melanogaster*. V. Molecular analysis of the Sd locus. *Genetics* 129: 133-144.
- 922 Presgraves, D. C., P. R. Gerard, A. Cherukuri and T. W. Lyttle, 2009 Large-scale selective sweep among  
923 *Segregation Distorter* chromosomes in African populations of *Drosophila melanogaster*. *PLoS*  
924 *Genet* 5: e1000463.
- 925 Purcell, S., B. Neale, K. Todd-Brown, L. Thomas, M. A. Ferreira *et al.*, 2007 PLINK: a tool set for whole-  
926 genome association and population-based linkage analyses. *Am J Hum Genet* 81: 559-575.
- 927 Quick, J.
- 928 Ruan, J., and H. Li, 2020 Fast and accurate long-read assembly with wtdbg2. *Nat Methods* 17: 155-158.
- 929 Sandler, L., and A. Carpenter, 1972 A note on the chromosomal site of action of SD in *Drosophila*  
930 *melanogaster*, pp. 247-268 in *Edinburgh Symposium on the Genetics of the Spermatozoon*.
- 931 Sandler, L., and Y. Hiraizumi, 1960 Meiotic drive in natural populations of *Drosophila melanogaster*. IV.  
932 Instability at the *Segregation-Distorter* locus. *Genetics* 45: 1269.
- 933 Sandler, L., Y. Hiraizumi and I. Sandler, 1959 Meiotic Drive in Natural Populations of *Drosophila*  
934 *Melanogaster*. I. the Cytogenetic Basis of Segregation-Distortion. *Genetics* 44: 233-250.
- 935 Schaeffer, S. W., and E. L. Miller, 1993 Estimates of linkage disequilibrium and the recombination  
936 parameter determined from segregating nucleotide sites in the alcohol dehydrogenase region of  
937 *Drosophila pseudoobscura*. *Genetics* 135: 541-552.
- 938 Schwander, T., R. Libbrecht and L. Keller, 2014 Supergenes and complex phenotypes. *Current Biology* 24:  
939 R288-R294.
- 940 Smit, A., R. Hubley and P. Green, 2013 RepeatMasker, pp. in *Open-4.0*.
- 941 Sniegowski, P. D., and B. Charlesworth, 1994 Transposable element numbers in cosmopolitan inversions  
942 from a natural population of *Drosophila melanogaster*. *Genetics* 137: 815-827.
- 943 Stevison, L. S., K. B. Hoehn and M. A. F. Noor, 2011 Effects of Inversions on Within- and Between-  
944 Species Recombination and Divergence. *Genome Biol Evol* 3: 830-841.
- 945 Stolle, E., R. Pracana, P. Howard, C. I. Paris, S. J. Brown *et al.*, 2019 Degenerative expansion of a young  
946 supergene. *Molecular biology and evolution* 36: 553-561.
- 947 Svedberg, J., S. Hosseini, J. Chen, A. A. Vogan, I. Mozgova *et al.*, 2018 Convergent evolution of complex  
948 genomic rearrangements in two fungal meiotic drive elements. *Nature communications* 9: 1-13.
- 949 team, R. c., 2019 R: A language and environment for statistical computing., pp. R Foundation for Statistical  
950 Computing, Vienna, Austria, R Foundation for Statistical Computing, Vienna, Austria.
- 951 Temin, R. G., B. Ganetzky, P. A. Powers, T. W. Lyttle, S. Pimpinelli *et al.*, 1991 Segregation distortion in  
952 *Drosophila melanogaster*: genetic and molecular analyses. *The American Naturalist* 137: 287-331.
- 953 Thompson, M. J., and C. D. Jiggins, 2014 Supergenes and their role in evolution. *Heredity* 113: 1-8.

- 954 Thornton, K., and P. Andolfatto, 2006 Approximate Bayesian inference reveals evidence for a recent,  
955 severe bottleneck in a Netherlands population of *Drosophila melanogaster*. *Genetics* 172: 1607-  
956 1619.
- 957 Turner, J. R., 1967 On supergenes. I. The evolution of supergenes. *The American Naturalist* 101: 195-221.
- 958 Tuttle, E. M., A. O. Bergland, M. L. Korody, M. S. Brewer, D. J. Newhouse *et al.*, 2016 Divergence and  
959 Functional Degradation of a Sex Chromosome-like Supergene. *Curr Biol* 26: 344-350.
- 960 Uyenoyama, M. K., 2005 Evolution under tight linkage to mating type. *New phytologist* 165: 63-70.
- 961 Walker, B. J., T. Abeel, T. Shea, M. Priest, A. Abouelliel *et al.*, 2014 Pilon: an integrated tool for  
962 comprehensive microbial variant detection and genome assembly improvement. *PLoS One* 9:  
963 e112963.
- 964 Wallace, L. T., and M. A. Erhart, 2008 Recombination within mouse t haplotypes has replaced significant  
965 segments of t-specific DNA. *Mammalian Genome* 19: 263.
- 966 Wang, J., Y. Wurm, M. Nipitwattanaphon, O. Riba-Grognuz, Y.-C. Huang *et al.*, 2013 A Y-like social  
967 chromosome causes alternative colony organization in fire ants. *Nature* 493: 664-668.
- 968 Weir, B. S., and C. C. Cockerham, 1984 Estimating F-Statistics for the Analysis of Population Structure.  
969 *Evolution* 38: 1358-1370.
- 970 Wick, R. R., L. M. Judd, C. L. Gorrie and K. E. Holt, 2017 Completing bacterial genome assemblies with  
971 multiplex MinION sequencing. *Microb Genom* 3: e000132.
- 972 Wu, C.-I., T. W. Lyttle, M.-L. Wu and G.-F. Lin, 1988 Association between a satellite DNA sequence and  
973 the responder of segregation distorter in *D. melanogaster*. *Cell* 54: 179-189.
- 974 Zhuang, J., J. Wang, W. Theurkauf and Z. Weng, 2014 TEMP: a computational method for analyzing  
975 transposable element polymorphism in populations. *Nucleic Acids Res* 42: 6826-6838.
- 976
